# Supplementary material for: Acute effects of focused ultrasound-induced increases in blood-brain barrier permeability on rat microvascular transcriptome
Source: PubMed Central journal article supplement (PMC5379491; doi:10.1038/srep45657), 2017-04-04
Supplement: srep45657-s1.pdf [file srep45657-s1.pdf]

# Acute effects of focused ultrasound-induced increases in blood-brain barrier permeability on rat microvascular transcriptome

Dallan McMahon, Reina Bendayan, and Kullervo Hynnen

## SUPPLEMENTARY TABLE, FIGURES, AND DATA

**Supplementary Data 1:** MIAME-compliant microarray data deposited in ArrayExpress. Accession number: E-MTAB-5251

### Supplementary Figures:

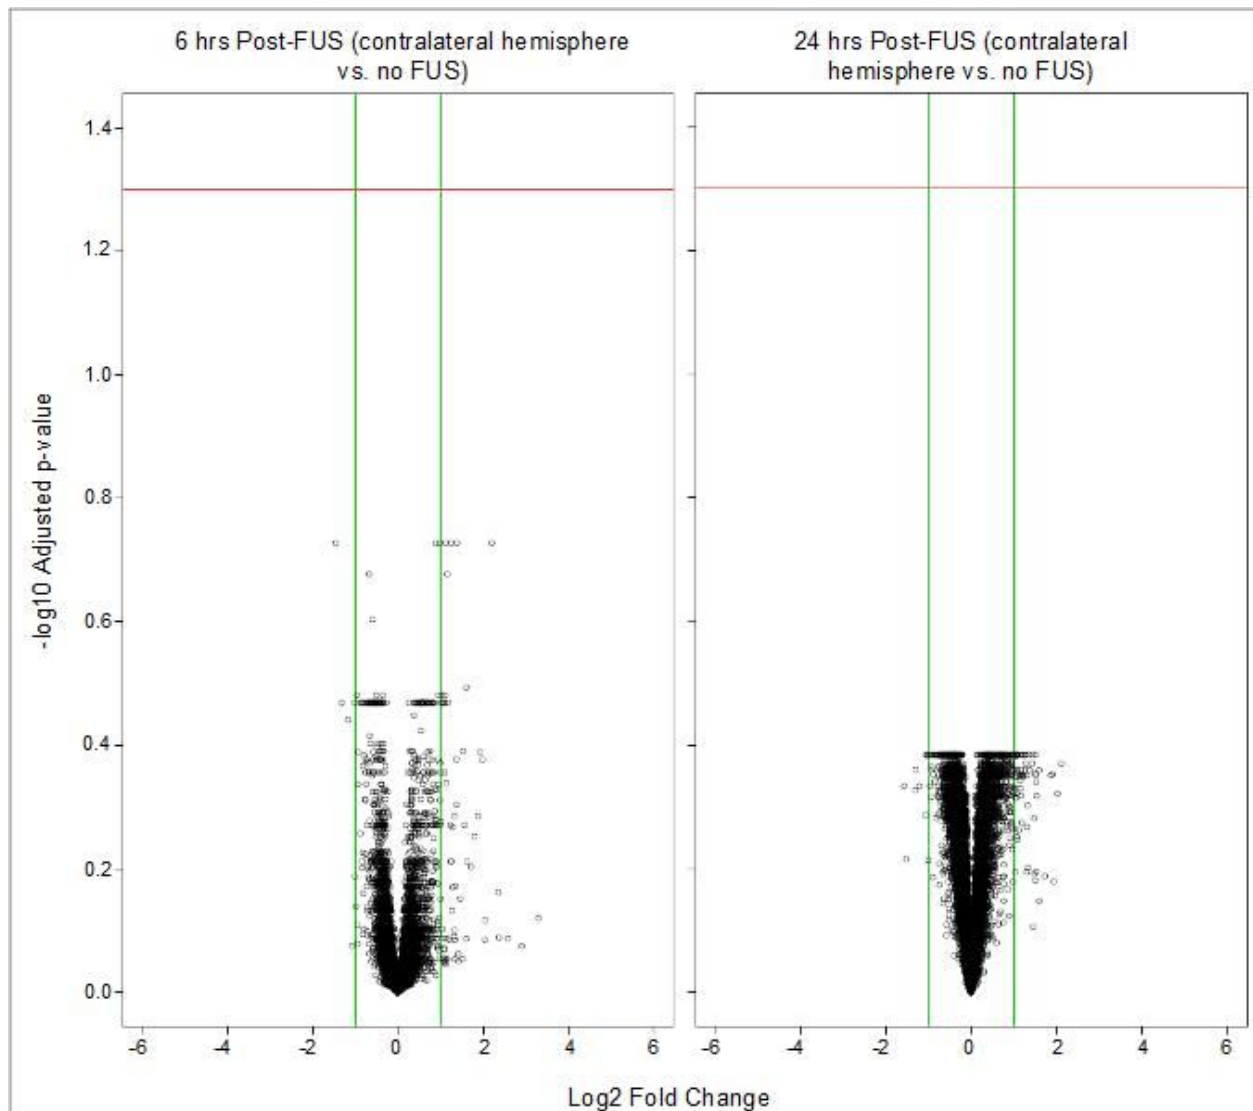

**Supplementary Figure 1: Volcano plots of differential gene expression.** Relative gene expression in hippocampal microvessels was compared between the hemispheres contralateral to sonication at 6 and 24 hrs post-FUS and animals that did not receive FUS. A positive log<sub>2</sub> fold change indicates increased relative expression in microvessels contralateral to sonication compared to non-sonicated control animals. Green vertical lines indicate a log<sub>2</sub> fold change of 1.0 or -1.0. Red horizontal lines indicate a -log<sub>10</sub> adjusted p-value of 1.30, corresponding to an adjusted p-value of 0.05.

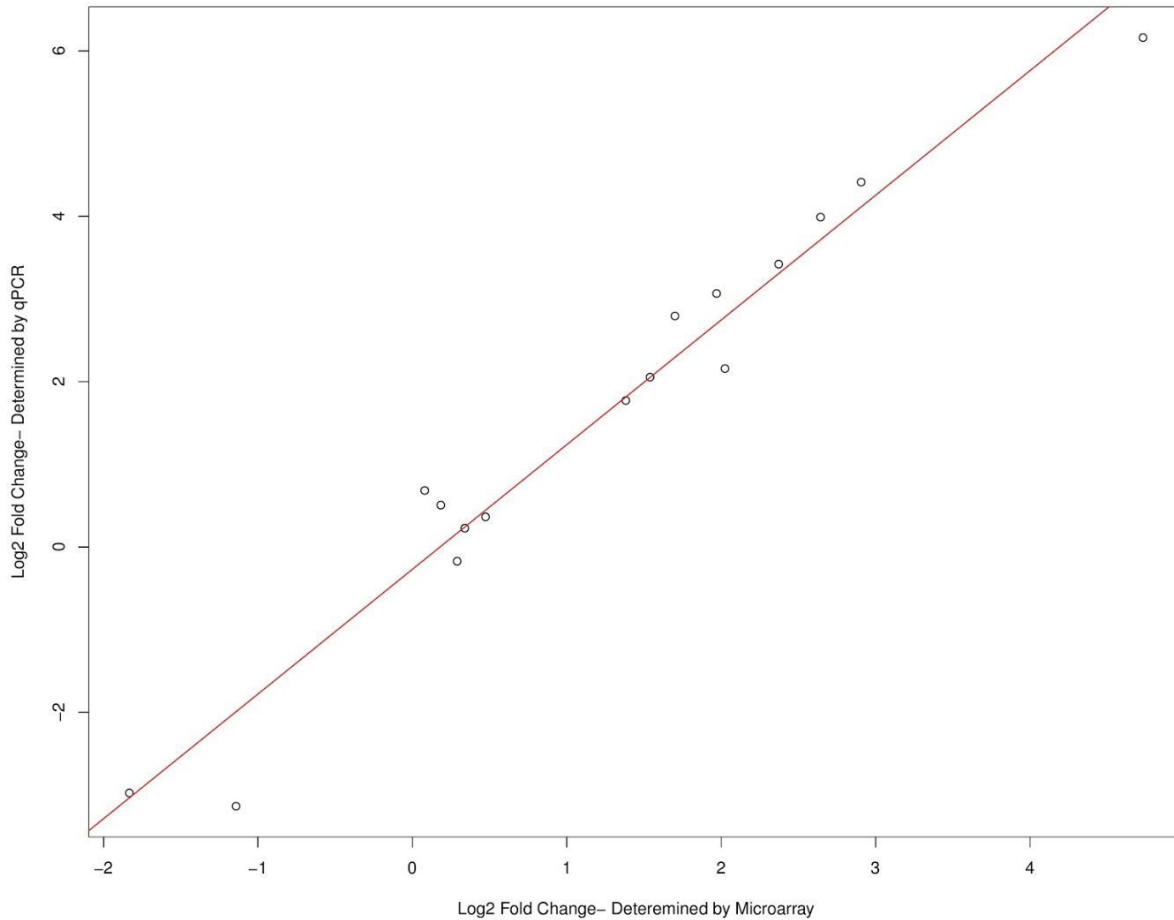

**Supplementary Figure 2: Differential expression of selected genes at 6 and 24 hrs post-FUS as measured by microarray analysis and qRT-PCR.** To validate differential gene expression results from the microarray analysis, qRT-PCR was used to assess relative expression of selected genes. A comparison of log<sub>2</sub> fold changes at 6 and 24 hrs post-FUS (compared to the contralateral hemisphere), as determined by each of these methods, shows a high correlation ( $r^2=0.959$ ). The log<sub>2</sub> fold change values used to generate this plot can be found in Supplementary Table 8.

**Supplementary Table 1: Upregulated genes in hippocampal microvessels at either 6 or 24 hrs following sonication (versus contralateral hemisphere)**

| Entrez ID | Gene Symbol | 6 hrs Post-FUS      |                  | 24 hrs Post-FUS     |                  |
|-----------|-------------|---------------------|------------------|---------------------|------------------|
|           |             | Log <sub>2</sub> FC | Adjusted P-Value | Log <sub>2</sub> FC | Adjusted P-Value |
| 24153     | A2m         | 0.37                | 0.585            | 1.73                | 0.019            |
| 300475    | Adamts8     | 1.60                | 0.025            | 0.41                | 0.619            |
| 29624     | Alox5ap     | -0.21               | 0.705            | 1.13                | 0.032            |
| 54323     | Arc         | 1.39                | 0.002            | -0.42               | 0.273            |
| 498282    | Arhgap30    | 0.30                | 0.546            | 1.01                | 0.043            |
| 497990    | Arl5c       | 1.12                | 0.012            | 0.16                | 0.778            |
| 304648    | Asf1b       | -0.11               | 0.816            | 1.38                | 0.004            |
| 78971     | Birc3       | 2.30                | 0.005            | 1.29                | 0.085            |
| 367901    | Btk         | -0.07               | 0.905            | 1.02                | 0.037            |
| 312705    | C1r         | -0.27               | 0.558            | 1.41                | 0.007            |
| 192262    | C1s         | 0.10                | 0.874            | 1.69                | 0.004            |
| 24232     | C3          | 1.26                | 0.031            | 1.55                | 0.023            |
| 84007     | C3ar1       | 0.60                | 0.116            | 1.01                | 0.026            |
| 297339    | Capg        | -0.35               | 0.579            | 1.40                | 0.033            |
| 311327    | Casc5       | -0.09               | 0.897            | 1.17                | 0.034            |
| 24770     | Ccl2        | 4.73                | <0.001           | 1.70                | 0.083            |
| 25542     | Ccl3        | 1.83                | 0.005            | 0.44                | 0.495            |

|        |           |       |       |       |       |
|--------|-----------|-------|-------|-------|-------|
| 287910 | Ccl6      | 0.68  | 0.454 | 1.94  | 0.045 |
| 287561 | Ccl7      | 3.57  | 0.005 | 1.56  | 0.170 |
| 114494 | Ccna2     | -0.17 | 0.760 | 1.00  | 0.043 |
| 60463  | Ccr2      | 2.42  | 0.106 | 4.11  | 0.023 |
| 117029 | Ccr5      | 0.62  | 0.191 | 1.15  | 0.036 |
| 60350  | Cd14      | 1.20  | 0.030 | 1.17  | 0.048 |
| 29185  | Cd37      | 0.31  | 0.496 | 1.10  | 0.026 |
| 25406  | Cd44      | 0.75  | 0.102 | 1.11  | 0.036 |
| 287435 | Cd68      | -0.03 | 0.971 | 1.52  | 0.006 |
| 303747 | Cd7       | 0.07  | 0.939 | 1.54  | 0.031 |
| 25599  | Cd74      | 0.34  | 0.732 | 2.64  | 0.009 |
| 366065 | Cers6     | 1.12  | 0.006 | -0.34 | 0.400 |
| 680338 | Clec12a   | -0.61 | 0.505 | 2.25  | 0.024 |
| 474143 | Clec4a    | -0.45 | 0.284 | 1.15  | 0.023 |
| 297584 | Clec4a2   | 0.10  | 0.945 | 2.12  | 0.046 |
| 362431 | Clec4a3   | -0.68 | 0.272 | 1.87  | 0.012 |
| 502902 | Clec7a    | 0.93  | 0.491 | 3.01  | 0.036 |
| 406864 | Clic1     | 0.59  | 0.233 | 1.59  | 0.011 |
| 155151 | Coro1a    | 1.00  | 0.040 | 0.63  | 0.205 |
| 24268  | Cp        | -0.01 | 0.990 | 1.86  | 0.002 |
| 24273  | Cryaa     | 1.12  | 0.053 | 1.28  | 0.045 |
| 171081 | Csf2rb    | 2.38  | 0.025 | 1.55  | 0.140 |
| 252929 | Ctsz      | 0.25  | 0.609 | 1.37  | 0.012 |
| 89808  | Cx3cl1    | 1.07  | 0.002 | -0.51 | 0.089 |
| 81503  | Cxcl1     | 2.74  | 0.003 | 0.47  | 0.621 |
| 305236 | Cxcl11    | 2.25  | 0.003 | 1.07  | 0.097 |
| 497942 | Cxcl16    | 0.70  | 0.201 | 1.31  | 0.039 |
| 66021  | Cybb      | -0.26 | 0.720 | 1.40  | 0.040 |
| 170901 | Efna3     | 1.13  | 0.018 | -0.40 | 0.421 |
| 25148  | Egr3      | 1.23  | 0.005 | -0.42 | 0.294 |
| 81505  | Emp3      | -0.15 | 0.818 | 1.24  | 0.031 |
| 295279 | Fcgr1a    | 0.01  | 0.988 | 1.16  | 0.026 |
| 304966 | Fcgr3a    | 0.08  | 0.936 | 1.44  | 0.048 |
| 114091 | Fcnb      | 2.81  | 0.008 | 0.84  | 0.440 |
| 362332 | Finc      | -0.17 | 0.761 | 1.08  | 0.039 |
| 314322 | Fos       | 1.31  | 0.046 | 0.62  | 0.376 |
| 25445  | Fosl1     | 2.06  | 0.006 | 0.51  | 0.517 |
| 499537 | Fyb       | 0.52  | 0.257 | 1.09  | 0.036 |
| 171164 | Gbp2      | 1.15  | 0.032 | 0.32  | 0.611 |
| 24387  | Gfap      | 0.29  | 0.468 | 1.54  | 0.002 |
| 499914 | Gins1     | -0.28 | 0.739 | 2.04  | 0.012 |
| 299783 | Glipr1    | 1.66  | 0.194 | 2.90  | 0.045 |
| 679819 | Glipr2    | 0.64  | 0.161 | 1.40  | 0.012 |
| 113940 | Gmfg      | 0.17  | 0.770 | 1.12  | 0.033 |
| 690825 | Gngt2     | 0.28  | 0.775 | 1.78  | 0.041 |
| 113955 | Gpnmb     | -0.28 | 0.571 | 1.69  | 0.003 |
| 24409  | Grin2a    | 1.03  | 0.026 | -0.77 | 0.092 |
| 311984 | Gsap      | 0.70  | 0.159 | 1.16  | 0.041 |
| 502125 | Hist1h2ah | 0.00  | 0.996 | 1.00  | 0.042 |
| 24471  | Hspb1     | 0.17  | 0.785 | 1.56  | 0.012 |
| 306564 | Htra4     | 1.47  | 0.005 | 0.14  | 0.823 |
| 293618 | Ifitm1    | -0.13 | 0.838 | 1.50  | 0.011 |
| 287813 | Igsf7     | 0.78  | 0.424 | 2.18  | 0.039 |
| 24494  | Il1b      | 3.18  | 0.003 | 0.35  | 0.762 |
| 24498  | Il6       | 2.85  | 0.016 | 1.78  | 0.119 |
| 368066 | Inmt      | 0.40  | 0.596 | 1.65  | 0.032 |
| 292060 | Irf8      | 0.61  | 0.185 | 1.07  | 0.043 |
| 290651 | Isyna1    | -0.62 | 0.054 | 1.07  | 0.007 |
| 25021  | Itgam     | 0.66  | 0.121 | 1.55  | 0.005 |
| 309684 | Itgb2     | 0.47  | 0.427 | 1.38  | 0.034 |
| 24517  | Junb      | 1.17  | 0.027 | 0.81  | 0.118 |
| 297666 | Klra5     | -0.25 | 0.657 | 1.85  | 0.003 |
| 317676 | Lat2      | 0.08  | 0.885 | 1.22  | 0.011 |
| 170496 | Lcn2      | 2.02  | 0.008 | 2.91  | 0.002 |
| 306071 | Lcp1      | 0.36  | 0.558 | 1.37  | 0.034 |
| 83781  | Lgals3    | 0.42  | 0.527 | 2.29  | 0.004 |

|           |           |       |        |       |       |
|-----------|-----------|-------|--------|-------|-------|
| 60584     | Lif       | 1.13  | 0.018  | -0.02 | 0.984 |
| 292594    | Lilrb4    | 1.76  | 0.088  | 3.23  | 0.011 |
| 315691    | Lingo1    | 1.37  | 0.013  | -0.86 | 0.104 |
| 361680    | Lsp1      | 1.05  | 0.183  | 2.08  | 0.026 |
| 291359    | Ly86      | -0.12 | 0.836  | 1.40  | 0.012 |
| 25211     | Lyz2      | 0.79  | 0.321  | 1.77  | 0.044 |
| 291885    | Mcm5      | 0.20  | 0.633  | 1.10  | 0.012 |
| 29685     | Mcm6      | 0.17  | 0.682  | 1.01  | 0.019 |
| 291234    | Mki67     | -0.35 | 0.584  | 1.83  | 0.011 |
| 81687     | Mmp9      | 2.53  | 0.006  | 1.55  | 0.083 |
| 304988    | Mnda      | 0.55  | 0.521  | 1.75  | 0.045 |
| 361735    | Ms4a6a    | 0.20  | 0.801  | 1.46  | 0.036 |
| 293749    | Ms4a6bl   | -0.86 | 0.091  | 1.43  | 0.020 |
| 314654    | Myo1f     | 0.00  | 0.997  | 1.14  | 0.036 |
| 58982     | Ncan      | 0.19  | 0.656  | 1.51  | 0.002 |
| 309452    | Nfkb2     | 1.21  | 0.046  | 0.40  | 0.571 |
| 266777    | Nptx1     | 1.32  | 0.028  | -0.89 | 0.136 |
| 288475    | Nptx2     | 1.55  | <0.001 | -0.40 | 0.234 |
| 83834     | Nrn1      | 1.23  | 0.026  | -0.99 | 0.078 |
| 24609     | Odc1      | 1.03  | 0.023  | 0.70  | 0.112 |
| 289247    | Olr1584   | 0.37  | 0.508  | 1.11  | 0.050 |
| 310132    | Osmr      | 1.33  | 0.048  | 1.06  | 0.123 |
| 363041    | Pate4     | 1.61  | 0.008  | 1.08  | 0.071 |
| 54320     | Pdpm      | 0.40  | 0.429  | 1.23  | 0.031 |
| 85311     | Pla1a     | 1.17  | 0.038  | 1.56  | 0.019 |
| 297694    | Plbd1     | -0.44 | 0.379  | 1.19  | 0.034 |
| 298199    | Plin2     | 0.26  | 0.561  | 1.13  | 0.018 |
| 302562    | Plp2      | -0.06 | 0.938  | 1.29  | 0.032 |
| 59103     | Ptges     | 2.03  | 0.005  | 0.82  | 0.216 |
| 362524    | Ptpn3     | 1.02  | 0.045  | -0.55 | 0.298 |
| 116689    | Ptpn6     | -0.05 | 0.939  | 1.11  | 0.034 |
| 689388    | Ptx3      | 3.12  | 0.005  | 1.24  | 0.235 |
| 282817    | Pycard    | -0.06 | 0.943  | 1.36  | 0.025 |
| 365042    | Rab32     | 0.92  | 0.150  | 1.42  | 0.050 |
| 366957    | Rac2      | 0.82  | 0.158  | 1.65  | 0.020 |
| 364190    | Ras10a    | 1.11  | 0.026  | -0.37 | 0.492 |
| 100360982 | Relb      | 1.30  | 0.034  | 0.55  | 0.403 |
| 360857    | Rgs16     | 1.43  | 0.050  | 0.90  | 0.229 |
| 289076    | Rgs18     | 0.01  | 0.991  | 1.57  | 0.026 |
| 362993    | Rnd1      | 1.65  | 0.013  | -0.57 | 0.410 |
| 309621    | RT1-Ba    | 0.44  | 0.629  | 2.41  | 0.012 |
| 309622    | RT1-Bb    | 0.21  | 0.852  | 2.53  | 0.014 |
| 294269    | RT1-Da    | 0.47  | 0.683  | 2.91  | 0.014 |
| 294273    | RT1-DMb   | 0.01  | 0.986  | 1.05  | 0.025 |
| 81778     | S100a10   | 0.31  | 0.647  | 1.28  | 0.046 |
| 445415    | S100a11   | -0.35 | 0.626  | 1.45  | 0.038 |
| 24615     | S100a4    | -0.24 | 0.732  | 1.62  | 0.020 |
| 25544     | Sele      | 3.82  | <0.001 | 0.40  | 0.650 |
| 313057    | Serinc2   | 1.66  | 0.004  | -0.34 | 0.560 |
| 24795     | Serpina3n | 0.98  | 0.212  | 1.86  | 0.039 |
| 24617     | Serpine1  | 2.37  | 0.036  | 1.97  | 0.089 |
| 155183    | Skap2     | -0.07 | 0.896  | 1.01  | 0.023 |
| 364049    | Slamf7    | -0.20 | 0.708  | 1.08  | 0.035 |
| 289235    | Slamf9    | -0.58 | 0.238  | 1.11  | 0.047 |
| 246239    | Slc15a3   | 1.24  | 0.018  | 0.82  | 0.107 |
| 366568    | Slc30a3   | 1.23  | 0.049  | -1.03 | 0.106 |
| 499587    | Slc7a14   | 1.19  | 0.046  | -1.05 | 0.088 |
| 303378    | Sifn13    | -0.18 | 0.756  | 1.23  | 0.025 |
| 24787     | Sod2      | 1.31  | 0.009  | 0.28  | 0.623 |
| 294043    | Sorcs3    | 1.07  | 0.025  | -0.31 | 0.568 |
| 308341    | Ssc5d     | -0.35 | 0.310  | 1.02  | 0.014 |
| 292483    | Stx11     | 1.17  | 0.035  | -0.06 | 0.950 |
| 24886     | Tbxas1    | -0.08 | 0.912  | 1.10  | 0.049 |
| 116510    | Timp1     | 1.27  | 0.059  | 2.59  | 0.003 |
| 24834     | Tk1       | -0.30 | 0.312  | 1.02  | 0.006 |
| 684440    | Tlr8      | -0.64 | 0.307  | 1.51  | 0.034 |

|        |          |      |       |      |       |
|--------|----------|------|-------|------|-------|
| 316516 | Tmbim1   | 0.41 | 0.395 | 1.37 | 0.014 |
| 299339 | Tnfaip2  | 2.14 | 0.005 | 0.52 | 0.495 |
| 683206 | Tnfaip3  | 1.03 | 0.034 | 0.07 | 0.923 |
| 686008 | Tnfrsf22 | 1.09 | 0.042 | 0.23 | 0.738 |
| 500590 | Tnfrsf9  | 1.06 | 0.007 | 0.24 | 0.579 |
| 301229 | Trem1    | 2.10 | 0.037 | 1.50 | 0.140 |
| 78969  | Trib1    | 1.06 | 0.005 | 0.46 | 0.176 |
| 307351 | Tubb6    | 0.65 | 0.232 | 1.53 | 0.021 |
| 361537 | Tyrobp   | 0.36 | 0.393 | 1.17 | 0.018 |

**Supplementary Table 2: Downregulated genes in hippocampal microvessels at either 6 or 24 hrs following sonication (versus contralateral hemisphere)**

| Entrez ID | Gene Symbol | 6 hrs Post-FUS |                  | 24 hrs Post-FUS |                  |
|-----------|-------------|----------------|------------------|-----------------|------------------|
|           |             | Log2 FC        | Adjusted P-Value | Log2 FC         | Adjusted P-Value |
| 287788    | Abca9       | -1.38          | 0.002            | 0.26            | 0.548            |
| 170913    | Abcb1a      | -1.14          | 0.042            | 0.08            | 0.927            |
| 314800    | Acss3       | -1.07          | 0.028            | 0.23            | 0.700            |
| 100363275 | Adgra2      | -1.07          | 0.025            | 0.38            | 0.443            |
| 24172     | Adh1        | -1.30          | 0.029            | 0.60            | 0.335            |
| 116676    | Aldh1a2     | -1.20          | 0.006            | 0.76            | 0.070            |
| 171100    | Angptl2     | -1.22          | 0.034            | 0.90            | 0.119            |
| 81641     | Anpep       | -1.03          | 0.007            | 0.52            | 0.151            |
| 29473     | Aoc3        | -1.31          | 0.021            | 0.32            | 0.616            |
| 306805    | Aspn        | -1.83          | 0.012            | 0.18            | 0.854            |
| 59302     | Bmp15       | -1.04          | 0.013            | -0.30           | 0.497            |
| 85272     | Bmp7        | -1.33          | 0.004            | 0.69            | 0.092            |
| 140724    | Cacng3      | 1.07           | 0.109            | -1.55           | 0.040            |
| 24932     | Cd4         | -1.04          | 0.024            | 0.58            | 0.195            |
| 503009    | Cdkl4       | 0.18           | 0.790            | -1.34           | 0.034            |
| 365871    | Ciart       | -1.01          | 0.048            | 0.29            | 0.634            |
| 245978    | Cklf        | -1.32          | 0.021            | 0.66            | 0.240            |
| 294141    | Clic2       | -1.35          | 0.034            | 0.29            | 0.717            |
| 310201    | Cmb1        | -1.16          | 0.026            | -0.06           | 0.946            |
| 114020    | Cml5        | -1.56          | 0.014            | -0.19           | 0.819            |
| 84352     | Col1a2      | -1.01          | 0.006            | 0.48            | 0.164            |
| 361289    | Colec12     | -1.01          | 0.006            | 0.30            | 0.419            |
| 360611    | Copz2       | -1.06          | 0.003            | 0.71            | 0.039            |
| 500046    | Cped1       | -1.46          | 0.009            | 0.16            | 0.818            |
| 83575     | Cpz         | -1.23          | 0.002            | 0.26            | 0.475            |
| 498392    | Cytl1       | -1.09          | 0.032            | -0.06           | 0.937            |
| 366270    | Edn3        | -1.32          | 0.009            | -0.09           | 0.905            |
| 365691    | Egflam      | -1.12          | 0.025            | 0.16            | 0.806            |
| 25043     | Eln         | -1.11          | 0.031            | 0.31            | 0.610            |
| 85496     | Enpp1       | -1.09          | 0.013            | 0.35            | 0.437            |
| 25315     | Ephx1       | -1.30          | 0.003            | 0.15            | 0.762            |
| 156826    | Eya2        | -1.02          | 0.013            | 0.88            | 0.040            |
| 362336    | Fam180a     | -2.20          | 0.001            | 0.53            | 0.352            |
| 691221    | Faxdc2      | -1.02          | 0.039            | 0.22            | 0.726            |
| 29558     | Fcgrt       | -1.26          | 0.006            | 0.39            | 0.381            |
| 499856    | Fibin       | -1.07          | 0.015            | 0.27            | 0.590            |
| 362366    | Fkbp14      | -1.14          | 0.009            | 0.36            | 0.407            |
| 297123    | Fkbp9       | -1.15          | 0.013            | 0.49            | 0.276            |
| 25256     | Fmo1        | -1.46          | 0.006            | 0.27            | 0.645            |
| 84493     | Fmo3        | -1.38          | 0.033            | 0.46            | 0.522            |
| 64507     | Fmod        | -1.26          | 0.007            | 0.44            | 0.335            |
| 79209     | Frk         | -1.93          | 0.009            | 0.16            | 0.872            |
| 24947     | Gabra3      | 0.75           | 0.211            | -1.34           | 0.048            |
| 394266    | Gjb2        | -1.58          | 0.004            | 0.13            | 0.853            |
| 84403     | Gjb6        | -1.04          | 0.048            | -0.48           | 0.395            |
| 25236     | Gpc3        | -1.28          | 0.011            | 0.45            | 0.376            |
| 60667     | Gpr20       | -1.06          | 0.042            | -0.06           | 0.942            |
| 300850    | Gsta4       | -1.20          | 0.014            | 0.04            | 0.958            |
| 24424     | Gstm2       | -1.70          | 0.006            | 0.21            | 0.776            |
| 362540    | Hacd4       | -1.03          | 0.049            | 0.46            | 0.426            |

|           |              |       |       |       |       |
|-----------|--------------|-------|-------|-------|-------|
| 24450     | Hmgcs2       | -1.08 | 0.028 | -0.31 | 0.578 |
| 100359865 | Hrct1        | -1.08 | 0.049 | 0.16  | 0.834 |
| 161476    | Hspb2        | -1.09 | 0.007 | 0.48  | 0.212 |
| 686539    | Islr         | -1.31 | 0.009 | 0.80  | 0.099 |
| 25118     | Itga1        | -1.02 | 0.042 | 0.23  | 0.723 |
| 364786    | Itga8        | -1.09 | 0.038 | 0.13  | 0.866 |
| 100361376 | Kank2        | -1.04 | 0.012 | 0.15  | 0.769 |
| 316758    | Lama1        | -1.11 | 0.016 | 0.44  | 0.334 |
| 361303    | Lims2        | -1.06 | 0.032 | 0.13  | 0.853 |
| 100361383 | LOC100361383 | -1.07 | 0.040 | -0.02 | 0.978 |
| 685513    | LOC685513    | -1.04 | 0.038 | 0.80  | 0.113 |
| 688126    | LOC688126    | -1.15 | 0.030 | 0.06  | 0.938 |
| 315714    | Loxl1        | -1.04 | 0.006 | 0.49  | 0.160 |
| 81682     | Lum          | -1.18 | 0.027 | 0.64  | 0.234 |
| 304131    | Map3k7cl     | -1.28 | 0.030 | 0.31  | 0.666 |
| 292671    | Mill1        | -1.67 | 0.006 | 0.19  | 0.796 |
| 300679    | Mpzi2        | -1.48 | 0.026 | 0.28  | 0.737 |
| 498011    | Mrc2         | -1.02 | 0.009 | 0.37  | 0.336 |
| 404641    | Mrgprh       | -1.49 | 0.028 | 0.06  | 0.959 |
| 361734    | Ms4a4a       | -1.36 | 0.039 | 0.88  | 0.188 |
| 313770    | Mxra8        | -1.19 | 0.006 | 0.40  | 0.333 |
| 24582     | Myh11        | -1.11 | 0.042 | 0.36  | 0.579 |
| 64570     | Nat8         | -1.47 | 0.009 | 0.16  | 0.829 |
| 312401    | Ndnf         | -1.63 | 0.003 | 0.18  | 0.764 |
| 246172    | Nexn         | -1.01 | 0.029 | 0.16  | 0.792 |
| 100912108 | Nupr1        | -1.15 | 0.028 | 0.80  | 0.120 |
| 500992    | Nxpe1        | -1.51 | 0.026 | 0.03  | 0.981 |
| 304507    | Oas1i        | -1.20 | 0.042 | 0.53  | 0.410 |
| 291015    | Ogn          | -1.04 | 0.004 | 0.11  | 0.803 |
| 83717     | Omd          | -1.75 | 0.002 | -0.01 | 0.984 |
| 29569     | Pcolce       | -1.05 | 0.007 | 0.45  | 0.227 |
| 89813     | Pdk4         | -1.48 | 0.005 | 0.03  | 0.974 |
| 685611    | Phldb2       | -1.07 | 0.023 | 0.12  | 0.853 |
| 64672     | Pln          | -1.59 | 0.005 | 0.52  | 0.337 |
| 84400     | Prelp        | -1.07 | 0.009 | 0.34  | 0.403 |
| 60357     | Prom1        | -1.26 | 0.042 | -0.06 | 0.949 |
| 171452    | Rab3il1      | -1.04 | 0.005 | 0.56  | 0.098 |
| 294789    | Ranbp3l      | -1.39 | 0.013 | 0.78  | 0.145 |
| 361819    | RGD1566085   | -1.08 | 0.049 | -0.13 | 0.870 |
| 297757    | Sbson        | -1.01 | 0.050 | 0.34  | 0.578 |
| 140927    | Selenbp1     | -1.22 | 0.006 | 0.01  | 0.984 |
| 84402     | Sfrp1        | -1.34 | 0.013 | 0.12  | 0.879 |
| 64846     | Slc13a3      | -1.31 | 0.043 | 0.48  | 0.518 |
| 503568    | Slc13a4      | -1.72 | 0.002 | 0.07  | 0.914 |
| 287450    | Slc16a11     | -1.14 | 0.020 | -0.13 | 0.847 |
| 295356    | Slc16a4      | -1.11 | 0.015 | 0.27  | 0.602 |
| 29509     | Slc22a6      | -1.83 | 0.003 | 0.18  | 0.794 |
| 83500     | Slc22a8      | -1.19 | 0.028 | 0.00  | 0.997 |
| 170840    | Slc40a1      | -1.42 | 0.028 | 0.10  | 0.913 |
| 171163    | Slc6a13      | -1.85 | 0.001 | 0.24  | 0.671 |
| 170698    | Slco1a2      | -1.13 | 0.037 | 0.29  | 0.659 |
| 306147    | Slitrk1      | 0.62  | 0.332 | -1.41 | 0.045 |
| 25554     | Snai2        | -1.03 | 0.018 | 0.47  | 0.267 |
| 498159    | Spry3        | 0.61  | 0.260 | -1.19 | 0.048 |
| 83783     | Sult1a1      | -1.56 | 0.008 | -0.09 | 0.910 |
| 192189    | Syt17        | 0.28  | 0.620 | -1.16 | 0.037 |
| 292406    | Thbs2        | -1.04 | 0.003 | 0.38  | 0.231 |
| 245953    | Tmem37       | -1.26 | 0.007 | 0.59  | 0.182 |
| 293874    | Trpm6        | -1.27 | 0.025 | 0.62  | 0.275 |
| 117514    | Txnip        | -1.02 | 0.009 | 0.44  | 0.241 |
| 89818     | Vamp5        | -1.07 | 0.013 | 0.62  | 0.140 |
| 361954    | Veph1        | -1.01 | 0.005 | 0.37  | 0.267 |
| 24877     | Vsnl1        | 0.54  | 0.240 | -1.02 | 0.048 |
| 64566     | Wnt5a        | -1.08 | 0.013 | 0.05  | 0.934 |
| 361552    | Wtip         | -1.50 | 0.014 | 0.16  | 0.848 |

**Supplementary Table 3: GO terms (molecular function) with significant positive or negative enrichment in GSEA at either 6 or 24 hrs post-FUS (versus contralateral hemisphere)**

| GO ID      | GO Description                                               | 6 hrs Post-FUS |                  | 24 hrs Post-FUS |                  |
|------------|--------------------------------------------------------------|----------------|------------------|-----------------|------------------|
|            |                                                              | NES            | Adjusted P-Value | NES             | Adjusted P-Value |
| GO:0015464 | acetylcholine receptor activity                              | 1.5            | 0.194            | -1.69           | 0.045            |
| GO:0022804 | active transmembrane transporter activity                    | -1.63          | 0.025            | -1.33           | 0.041            |
| GO:0003995 | acyl-CoA dehydrogenase activity                              | -1.91          | 0.037            |                 | >0.99            |
| GO:0008179 | adenylate cyclase binding                                    | 1.21           | 0.488            | -1.69           | 0.045            |
| GO:0031420 | alkali metal ion binding                                     | 1.64           | 0.094            | -1.97           | 0.02             |
| GO:0033218 | amide binding                                                | -1.37          | 0.094            | 1.58            | 0.022            |
| GO:0043176 | amine binding                                                | 1.21           | 0.488            | -1.76           | 0.02             |
| GO:0015171 | amino acid transmembrane transporter activity                | -1.59          | 0.037            | -1.48           | 0.08             |
| GO:0004177 | aminopeptidase activity                                      | -1.7           | 0.069            | 1.91            | 0.02             |
| GO:0070405 | ammonium ion binding                                         | 1.56           | 0.111            | -1.82           | 0.02             |
| GO:0005253 | anion channel activity                                       | 1.07           | 0.577            | -1.97           | 0.02             |
| GO:0008509 | anion transmembrane transporter activity                     | -1.65          | 0.025            | -1.71           | 0.02             |
| GO:0015296 | anion:cation symporter activity                              | -1.41          | 0.193            | -1.55           | 0.045            |
| GO:0003823 | antigen binding                                              | -1.07          | 0.582            | 2.24            | 0.02             |
| GO:0016209 | antioxidant activity                                         | 1.52           | 0.125            | 1.77            | 0.02             |
| GO:0004003 | ATP-dependent DNA helicase activity                          | -0.71          | 0.966            | 1.74            | 0.045            |
| GO:0042625 | ATPase activity, coupled to transmembrane movement of ions   | 1.01           | 0.669            | -1.57           | 0.046            |
| GO:0008503 | benzodiazepine receptor activity                             | 1.46           | 0.236            | -1.79           | 0.037            |
| GO:0008013 | beta-catenin binding                                         | -1.64          | 0.025            |                 | >0.99            |
| GO:0015106 | bicarbonate transmembrane transporter activity               | 1.08           | 0.606            | -1.85           | 0.02             |
| GO:0016493 | C-C chemokine receptor activity                              | 1.87           | 0.025            | 1.69            | 0.056            |
| GO:0005262 | calcium channel activity                                     | 1.7            | 0.025            | -2.26           | 0.02             |
| GO:0005246 | calcium channel regulator activity                           | 1.44           | 0.2              | -2.15           | 0.02             |
| GO:0015085 | calcium ion transmembrane transporter activity               | 1.68           | 0.025            | -2.37           | 0.02             |
| GO:0004683 | calmodulin-dependent protein kinase activity                 | 1.33           | 0.282            | -1.84           | 0.029            |
| GO:0005516 | calmodulin binding                                           | 1.66           | 0.025            | -2.23           | 0.021            |
| GO:0030246 | carbohydrate binding                                         | 1.25           | 0.159            | 2.05            | 0.02             |
| GO:0016835 | carbon-oxygen lyase activity                                 | -1.72          | 0.025            | -0.88           | 0.841            |
| GO:0046943 | carboxylic acid transmembrane transporter activity           | -1.77          | 0.025            | -1.33           | 0.144            |
| GO:0004180 | carboxypeptidase activity                                    | -1.78          | 0.037            | 1.06            | 0.567            |
| GO:0038024 | cargo receptor activity                                      | -1.76          | 0.046            | 1.95            | 0.02             |
| GO:0005261 | cation channel activity                                      | 1.95           | 0.025            | -2.47           | 0.021            |
| GO:0008324 | cation transmembrane transporter activity                    | 1.5            | 0.025            | -2.11           | 0.022            |
| GO:0048020 | CCR chemokine receptor binding                               | 2.55           | 0.025            | 2.2             | 0.02             |
| GO:0050839 | cell adhesion molecule binding                               | -1.29          | 0.183            | 1.8             | 0.02             |
| GO:0015267 | channel activity                                             | 1.83           | 0.025            | -2.45           | 0.021            |
| GO:0016247 | channel regulator activity                                   | 1.56           | 0.047            | -2.19           | 0.02             |
| GO:0008009 | chemokine activity                                           | 2.47           | 0.025            | 2.07            | 0.02             |
| GO:0019956 | chemokine binding                                            | 1.56           | 0.165            | 2.18            | 0.02             |
| GO:0004950 | chemokine receptor activity                                  | 1.58           | 0.154            | 1.96            | 0.02             |
| GO:0042379 | chemokine receptor binding                                   | 2.56           | 0.025            | 2.33            | 0.02             |
| GO:0005254 | chloride channel activity                                    | 1.09           | 0.554            | -1.99           | 0.02             |
| GO:0015108 | chloride transmembrane transporter activity                  | 1.04           | 0.63             | -1.93           | 0.02             |
| GO:0030276 | clathrin binding                                             | 1.84           | 0.025            | -2.21           | 0.02             |
| GO:0050662 | coenzyme binding                                             | -1.79          | 0.025            | 1.35            | 0.063            |
| GO:0048037 | cofactor binding                                             | -1.8           | 0.025            | 1.24            | 0.14             |
| GO:0005518 | collagen binding                                             | -2.29          | 0.025            | 1.69            | 0.039            |
| GO:0001848 | complement binding                                           | 1.08           | 0.599            | 2.03            | 0.02             |
| GO:0045236 | CXCR chemokine receptor binding                              | 1.82           | 0.037            | 1.8             | 0.025            |
| GO:0005125 | cytokine activity                                            | 2.19           | 0.025            | 2.08            | 0.02             |
| GO:0019955 | cytokine binding                                             | 1.44           | 0.117            | 2.46            | 0.02             |
| GO:0004896 | cytokine receptor activity                                   | 1.81           | 0.025            | 2.35            | 0.02             |
| GO:0005126 | cytokine receptor binding                                    | 1.97           | 0.025            | 2.28            | 0.02             |
| GO:0005251 | delayed rectifier potassium channel activity                 | 2.08           | 0.025            | -2.38           | 0.02             |
| GO:0072509 | divalent inorganic cation transmembrane transporter activity | 1.64           | 0.025            | -2.14           | 0.02             |
| GO:0008094 | DNA-dependent ATPase activity                                | -1.01          | 0.676            | 1.79            | 0.02             |
| GO:0008301 | DNA binding, bending                                         | -1.82          | 0.037            | 1.52            | 0.122            |
| GO:0003690 | double-stranded DNA binding                                  | 0.97           | 0.741            | 1.52            | 0.049            |
| GO:0015238 | drug transmembrane transporter activity                      | -1.81          | 0.047            | 0.94            | 0.73             |

|            |                                                                                           |       |       |       |       |
|------------|-------------------------------------------------------------------------------------------|-------|-------|-------|-------|
| GO:0090484 | drug transporter activity                                                                 | -1.85 | 0.037 | 0.93  | 0.754 |
| GO:0004866 | endopeptidase inhibitor activity                                                          | 1.46  | 0.047 | 2.16  | 0.02  |
| GO:0061135 | endopeptidase regulator activity                                                          | 1.42  | 0.084 | 2.17  | 0.02  |
| GO:0004857 | enzyme inhibitor activity                                                                 | 1.1   | 0.423 | 1.84  | 0.02  |
| GO:0046875 | ephrin receptor binding                                                                   | 1.74  | 0.047 | -1.3  | 0.321 |
| GO:0005231 | excitatory extracellular ligand-gated ion channel activity                                | 1.82  | 0.025 | -2.21 | 0.02  |
| GO:0004527 | exonuclease activity                                                                      | -0.74 | 0.976 | 1.74  | 0.02  |
| GO:0008238 | exopeptidase activity                                                                     | -1.91 | 0.025 | 1.23  | 0.318 |
| GO:0005234 | extracellular-glutamate-gated ion channel activity                                        | 1.96  | 0.025 | -2.31 | 0.02  |
| GO:0005230 | extracellular ligand-gated ion channel activity                                           | 2.04  | 0.025 | -2.57 | 0.02  |
| GO:0050840 | extracellular matrix binding                                                              | -1.56 | 0.106 | 2.17  | 0.02  |
| GO:0005201 | extracellular matrix structural constituent                                               | -2.2  | 0.025 | 1.92  | 0.02  |
| GO:0000062 | fatty-acyl-CoA binding                                                                    | -1.75 | 0.037 | 0.83  | 0.862 |
| GO:0005504 | fatty acid binding                                                                        | 1.35  | 0.268 | 1.66  | 0.039 |
| GO:0001968 | fibronectin binding                                                                       | -1.12 | 0.561 | 1.83  | 0.02  |
| GO:0050660 | flavin adenine dinucleotide binding                                                       | -1.73 | 0.037 | 1.42  | 0.09  |
| GO:0005109 | frizzled binding                                                                          | -1.87 | 0.025 | 0.72  | 0.973 |
| GO:0008227 | G-protein coupled amine receptor activity                                                 | 1.71  | 0.056 | -2.16 | 0.02  |
| GO:0001637 | G-protein coupled chemoattractant receptor activity                                       | 1.58  | 0.154 | 1.96  | 0.02  |
| GO:0001664 | G-protein coupled receptor binding                                                        | 2     | 0.025 | 1.36  | 0.052 |
| GO:0004890 | GABA-A receptor activity                                                                  | 1.62  | 0.104 | -2.21 | 0.02  |
| GO:0016917 | GABA receptor activity                                                                    | 1.75  | 0.066 | -2.27 | 0.02  |
| GO:0050811 | GABA receptor binding                                                                     | 1.03  | 0.672 | -1.81 | 0.037 |
| GO:0022836 | gated channel activity                                                                    | 2.16  | 0.025 | -2.7  | 0.021 |
| GO:0016595 | glutamate binding                                                                         | 1.6   | 0.177 | -2.05 | 0.02  |
| GO:0008066 | glutamate receptor activity                                                               | 2.22  | 0.025 | -2.49 | 0.02  |
| GO:0035254 | glutamate receptor binding                                                                | 1.56  | 0.127 | -2.05 | 0.02  |
| GO:0004602 | glutathione peroxidase activity                                                           | -1.97 | 0.025 | 1.5   | 0.138 |
| GO:0004364 | glutathione transferase activity                                                          | -1.87 | 0.037 | 0.79  | 0.91  |
| GO:0001948 | glycoprotein binding                                                                      | -1.29 | 0.245 | 1.55  | 0.031 |
| GO:0005539 | glycosaminoglycan binding                                                                 | 1.25  | 0.217 | 2.13  | 0.02  |
| GO:0019838 | growth factor binding                                                                     | -1.31 | 0.195 | 2.08  | 0.02  |
| GO:0070851 | growth factor receptor binding                                                            | 1.52  | 0.056 | 1.72  | 0.02  |
| GO:0003924 | GTPase activity                                                                           | 1.72  | 0.038 | 1.16  | 0.339 |
| GO:0008201 | heparin binding                                                                           | 1.34  | 0.153 | 2.1   | 0.02  |
| GO:0008331 | high voltage-gated calcium channel activity                                               | 1.97  | 0.025 | -1.97 | 0.02  |
| GO:0005179 | hormone activity                                                                          | -0.96 | 0.753 | -1.51 | 0.03  |
| GO:0016836 | hydro-lyase activity                                                                      | -1.67 | 0.037 | -1.1  | 0.5   |
| GO:0016814 | hydrolase activity, acting on carbon-nitrogen (but not peptide) bonds, in cyclic amidines | 0.89  | 0.816 | 1.77  | 0.031 |
| GO:0016798 | hydrolase activity, acting on glycosyl bonds                                              | -1.66 | 0.025 | 1.53  | 0.038 |
| GO:0004553 | hydrolase activity, hydrolyzing O-glycosyl compounds                                      | -1.71 | 0.025 | 1.68  | 0.039 |
| GO:0019865 | immunoglobulin binding                                                                    | -1.34 | 0.306 | 2.26  | 0.02  |
| GO:0005237 | inhibitory extracellular ligand-gated ion channel activity                                | 1.49  | 0.231 | -2.1  | 0.02  |
| GO:0015103 | inorganic anion transmembrane transporter activity                                        | -1.05 | 0.598 | -1.95 | 0.02  |
| GO:0022890 | inorganic cation transmembrane transporter activity                                       | 1.65  | 0.025 | -2.25 | 0.021 |
| GO:0005178 | integrin binding                                                                          | -1.73 | 0.025 | 2.2   | 0.02  |
| GO:0005149 | interleukin-1 receptor binding                                                            | 1.96  | 0.025 | 1.46  | 0.196 |
| GO:0005242 | inward rectifier potassium channel activity                                               | 1.29  | 0.381 | -2.06 | 0.02  |
| GO:0005216 | ion channel activity                                                                      | 1.93  | 0.025 | -2.54 | 0.021 |
| GO:0044325 | ion channel binding                                                                       | 1.84  | 0.025 | -2.02 | 0.02  |
| GO:0015075 | ion transmembrane transporter activity                                                    | 1.37  | 0.025 | -2.14 | 0.022 |
| GO:0004970 | ionotropic glutamate receptor activity                                                    | 1.95  | 0.025 | -2.21 | 0.02  |
| GO:0035255 | ionotropic glutamate receptor binding                                                     | 1.02  | 0.672 | -1.75 | 0.039 |
| GO:0016853 | isomerase activity                                                                        | -1.28 | 0.203 | 1.53  | 0.039 |
| GO:0019840 | isoprenoid binding                                                                        | -1.8  | 0.037 | 1.3   | 0.26  |
| GO:0019894 | kinesin binding                                                                           | 2.09  | 0.025 | -2.01 | 0.038 |
| GO:0015179 | L-amino acid transmembrane transporter activity                                           | 1.01  | 0.672 | -1.85 | 0.02  |
| GO:0005313 | L-glutamate transmembrane transporter activity                                            | 0.87  | 0.817 | -1.65 | 0.045 |
| GO:0043236 | laminin binding                                                                           | -1.65 | 0.08  | 1.85  | 0.02  |
| GO:0022840 | leak channel activity                                                                     | 1.13  | 0.559 | -1.76 | 0.027 |
| GO:0022834 | ligand-gated channel activity                                                             | 1.83  | 0.025 | -2.48 | 0.02  |
| GO:0015276 | ligand-gated ion channel activity                                                         | 1.83  | 0.025 | -2.48 | 0.02  |
| GO:0016829 | lyase activity                                                                            | -1.62 | 0.025 | 0.84  | 0.944 |
| GO:0044877 | macromolecular complex binding                                                            | -1    | 0.661 | 1.6   | 0.02  |
| GO:0033549 | MAP kinase phosphatase activity                                                           | 2.06  | 0.025 | 1.12  | 0.533 |



|            |                                                                                         |       |       |       |       |
|------------|-----------------------------------------------------------------------------------------|-------|-------|-------|-------|
| GO:0017017 | MAP kinase tyrosine/serine/threonine phosphatase activity                               | 2.03  | 0.025 | 1.13  | 0.526 |
| GO:0046873 | metal ion transmembrane transporter activity                                            | 1.78  | 0.025 | -2.4  | 0.02  |
| GO:0042288 | MHC class I protein binding                                                             | 0.69  | 0.971 | 1.83  | 0.024 |
| GO:0023026 | MHC class II protein complex binding                                                    | 1.69  | 0.103 | 2.06  | 0.02  |
| GO:0042287 | MHC protein binding                                                                     | 1.15  | 0.517 | 1.93  | 0.02  |
| GO:0023023 | MHC protein complex binding                                                             | 1.84  | 0.047 | 2     | 0.02  |
| GO:0072349 | modified amino acid transmembrane transporter activity                                  | -1.83 | 0.047 | 1.54  | 0.127 |
| GO:0033293 | monocarboxylic acid binding                                                             | 1.02  | 0.672 | 1.63  | 0.045 |
| GO:0008028 | monocarboxylic acid transmembrane transporter activity                                  | -1.97 | 0.025 | 1.06  | 0.592 |
| GO:0048029 | monosaccharide binding                                                                  | -1.22 | 0.381 | 1.77  | 0.022 |
| GO:0015077 | monovalent inorganic cation transmembrane transporter activity                          | 1.55  | 0.025 | -2.21 | 0.021 |
| GO:0051287 | NAD binding                                                                             | -1.76 | 0.025 | 0.95  | 0.753 |
| GO:0022842 | narrow pore channel activity                                                            | 1.13  | 0.559 | -1.76 | 0.027 |
| GO:0008188 | neuropeptide receptor activity                                                          | 1.77  | 0.048 | -1.53 | 0.093 |
| GO:0042165 | neurotransmitter binding                                                                | 1.5   | 0.194 | -1.92 | 0.02  |
| GO:0030594 | neurotransmitter receptor activity                                                      | 1.97  | 0.025 | -2.19 | 0.02  |
| GO:0004715 | non-membrane spanning protein tyrosine kinase activity                                  | -0.98 | 0.72  | 1.93  | 0.02  |
| GO:0004518 | nuclease activity                                                                       | -0.91 | 0.855 | 1.62  | 0.02  |
| GO:0031492 | nucleosomal DNA binding                                                                 | -1.69 | 0.037 | 1.47  | 0.152 |
| GO:0031491 | nucleosome binding                                                                      | -1.51 | 0.123 | 1.71  | 0.023 |
| GO:0005342 | organic acid transmembrane transporter activity                                         | -1.76 | 0.025 | -1.32 | 0.143 |
| GO:0008514 | organic anion transmembrane transporter activity                                        | -1.79 | 0.025 | -1.47 | 0.04  |
| GO:0016491 | oxidoreductase activity                                                                 | -1.71 | 0.025 | 1.44  | 0.02  |
| GO:0016614 | oxidoreductase activity, acting on CH-OH group of donors                                | -1.59 | 0.047 | 1.09  | 0.488 |
| GO:0016684 | oxidoreductase activity, acting on peroxide as acceptor                                 | -1.48 | 0.168 | 1.61  | 0.045 |
| GO:0016627 | oxidoreductase activity, acting on the CH-CH group of donors                            | -2.12 | 0.025 | 0.89  | 0.823 |
| GO:0016628 | oxidoreductase activity, acting on the CH-CH group of donors, NAD or NADP as acceptor   | -1.86 | 0.037 | 1.08  | 0.567 |
| GO:0052890 | oxidoreductase activity, acting on the CH-CH group of donors, with a flavin as acceptor | -1.8  | 0.047 |       | >0.99 |
| GO:0016616 | oxidoreductase activity, acting on the CH-OH group of donors, NAD or NADP as acceptor   | -1.65 | 0.025 | 1.13  | 0.398 |
| GO:0022803 | passive transmembrane transporter activity                                              | 1.83  | 0.025 | -2.45 | 0.021 |
| GO:0001871 | pattern binding                                                                         | -1.25 | 0.407 | 1.78  | 0.045 |
| GO:0038187 | pattern recognition receptor activity                                                   | 1.35  | 0.286 | 2.02  | 0.02  |
| GO:0030165 | PDZ domain binding                                                                      | 1.18  | 0.356 | -1.99 | 0.02  |
| GO:0016504 | peptidase activator activity                                                            | -1.88 | 0.025 | 1.75  | 0.045 |
| GO:0030414 | peptidase inhibitor activity                                                            | 1.37  | 0.122 | 2.12  | 0.02  |
| GO:0061134 | peptidase regulator activity                                                            | -1.17 | 0.341 | 2.15  | 0.02  |
| GO:0042605 | peptide antigen binding                                                                 | -1.27 | 0.365 | 2.17  | 0.02  |
| GO:0042277 | peptide binding                                                                         | -1.27 | 0.187 | 1.61  | 0.022 |
| GO:0004601 | peroxidase activity                                                                     | -1.47 | 0.168 | 1.61  | 0.039 |
| GO:0043274 | phospholipase binding                                                                   | 1.97  | 0.025 | -1.12 | 0.514 |
| GO:0016775 | phosphotransferase activity, nitrogenous group as acceptor                              | 1.77  | 0.037 | -1.74 | 0.051 |
| GO:0001784 | phosphotyrosine binding                                                                 | 1.67  | 0.083 | 1.71  | 0.039 |
| GO:0048407 | platelet-derived growth factor binding                                                  | -1.92 | 0.025 | 1.68  | 0.072 |
| GO:0030247 | polysaccharide binding                                                                  | -1.25 | 0.407 | 1.78  | 0.045 |
| GO:0005267 | potassium channel activity                                                              | 2.03  | 0.025 | -2.54 | 0.02  |
| GO:0015459 | potassium channel regulator activity                                                    | 0.97  | 0.741 | -1.54 | 0.045 |
| GO:0022841 | potassium ion leak channel activity                                                     | 1.06  | 0.617 | -1.75 | 0.037 |
| GO:0015079 | potassium ion transmembrane transporter activity                                        | 1.91  | 0.025 | -2.44 | 0.02  |
| GO:0002020 | protease binding                                                                        | 1.28  | 0.245 | 2.14  | 0.02  |
| GO:0032403 | protein complex binding                                                                 | -1.09 | 0.327 | 1.65  | 0.02  |
| GO:1990782 | protein tyrosine kinase binding                                                         | -1.42 | 0.162 | 1.62  | 0.045 |
| GO:0005102 | receptor binding                                                                        | 1.43  | 0.025 | 1.52  | 0.02  |
| GO:0030971 | receptor tyrosine kinase binding                                                        | -1.31 | 0.274 | 1.62  | 0.045 |
| GO:0070491 | repressing transcription factor binding                                                 | -1.13 | 0.513 | 1.58  | 0.024 |
| GO:0005501 | retinoid binding                                                                        | -1.87 | 0.037 | 1.34  | 0.265 |
| GO:0004745 | retinol dehydrogenase activity                                                          | -1.46 | 0.231 | 1.69  | 0.046 |
| GO:0003723 | RNA binding                                                                             | 0.95  | 0.921 | 1.64  | 0.02  |
| GO:0044548 | S100 protein binding                                                                    | -1.64 | 0.115 | 2.01  | 0.02  |
| GO:0005044 | scavenger receptor activity                                                             | -2.01 | 0.025 | 1.95  | 0.02  |
| GO:0015291 | secondary active transmembrane transporter activity                                     | -1.65 | 0.025 | -1.34 | 0.065 |
| GO:0004867 | serine-type endopeptidase inhibitor activity                                            | 1.31  | 0.268 | 2.06  | 0.02  |

|            |                                                       |       |       |       |       |
|------------|-------------------------------------------------------|-------|-------|-------|-------|
| GO:0004993 | serotonin receptor activity                           | 1.88  | 0.047 | -2.03 | 0.02  |
| GO:0008329 | signaling pattern recognition receptor activity       | 1.35  | 0.286 | 2.02  | 0.02  |
| GO:0003697 | single-stranded DNA binding                           | -0.86 | 0.882 | 1.83  | 0.02  |
| GO:0000149 | SNARE binding                                         | 1.76  | 0.025 | -2.19 | 0.02  |
| GO:0030515 | snoRNA binding                                        | 1.94  | 0.025 | 1.08  | 0.578 |
| GO:0005272 | sodium channel activity                               | 2.13  | 0.025 | -1.86 | 0.02  |
| GO:0017080 | sodium channel regulator activity                     | 1.14  | 0.488 | -1.67 | 0.027 |
| GO:0031402 | sodium ion binding                                    | 1.55  | 0.178 | -1.96 | 0.025 |
| GO:0015081 | sodium ion transmembrane transporter activity         | 1.2   | 0.33  | -1.93 | 0.02  |
| GO:0015294 | solute:cation symporter activity                      | -1.54 | 0.047 | -1.32 | 0.172 |
| GO:0030507 | spectrin binding                                      | 1.65  | 0.115 | -1.76 | 0.037 |
| GO:0003735 | structural constituent of ribosome                    | -1.23 | 0.232 | 2.4   | 0.02  |
| GO:0005198 | structural molecule activity                          | -1.05 | 0.503 | 1.82  | 0.02  |
| GO:0043566 | structure-specific DNA binding                        | -0.98 | 0.721 | 1.7   | 0.02  |
| GO:0022838 | substrate-specific channel activity                   | 1.93  | 0.025 | -2.52 | 0.021 |
| GO:0022891 | substrate-specific transmembrane transporter activity | 1.38  | 0.025 | -2.06 | 0.022 |
| GO:0022892 | substrate-specific transporter activity               | 1.34  | 0.025 | -1.9  | 0.023 |
| GO:1901681 | sulfur compound binding                               | -1.45 | 0.047 | 1.89  | 0.02  |
| GO:0015293 | symporter activity                                    | -1.54 | 0.047 | -1.26 | 0.21  |
| GO:0017075 | syntaxin-1 binding                                    | 1.75  | 0.047 | -2.08 | 0.02  |
| GO:0019905 | syntaxin binding                                      | 1.73  | 0.038 | -2.21 | 0.02  |
| GO:0050321 | tau-protein kinase activity                           | 1.44  | 0.251 | -1.78 | 0.039 |
| GO:0050431 | transforming growth factor beta binding               | -1.85 | 0.047 | 2.03  | 0.02  |
| GO:0022857 | transmembrane transporter activity                    | 1.27  | 0.056 | -2    | 0.023 |
| GO:0005215 | transporter activity                                  | 1.24  | 0.037 | -1.79 | 0.025 |
| GO:0015631 | tubulin binding                                       | 1.55  | 0.025 | -1.43 | 0.041 |
| GO:0001618 | virus receptor activity                               | -1.42 | 0.283 | 1.69  | 0.04  |
| GO:0019842 | vitamin binding                                       | -2.22 | 0.025 | 1.16  | 0.388 |
| GO:0005245 | voltage-gated calcium channel activity                | 1.92  | 0.025 | -2.56 | 0.02  |
| GO:0022843 | voltage-gated cation channel activity                 | 2.41  | 0.025 | -2.81 | 0.02  |
| GO:0022832 | voltage-gated channel activity                        | 2.22  | 0.025 | -2.72 | 0.02  |
| GO:0005244 | voltage-gated ion channel activity                    | 2.22  | 0.025 | -2.72 | 0.02  |
| GO:0005249 | voltage-gated potassium channel activity              | 2.12  | 0.025 | -2.64 | 0.02  |
| GO:0005248 | voltage-gated sodium channel activity                 | 2.04  | 0.025 | -1.66 | 0.094 |
| GO:0017147 | Wnt-protein binding                                   | -1.94 | 0.025 | 1.41  | 0.221 |

**Supplementary Table 4: GO terms (biological process) with significant positive or negative enrichment in GSEA at either 6 or 24 hrs post-FUS (versus contralateral hemisphere)**

| GO ID      | GO Description                                                                                                            | 6 hrs Post-FUS |                  | 24 hrs Post-FUS |                  |
|------------|---------------------------------------------------------------------------------------------------------------------------|----------------|------------------|-----------------|------------------|
|            |                                                                                                                           | NES)           | Adjusted P-Value | NES             | Adjusted P-Value |
| GO:0001508 | action potential                                                                                                          | 1.86           | 0.015            | -2.34           | 0.01             |
| GO:0002253 | activation of immune response                                                                                             | 1.25           | 0.132            | 2.54            | 0.009            |
| GO:0002218 | activation of innate immune response                                                                                      | 1.31           | 0.172            | 2.48            | 0.009            |
| GO:0006953 | acute-phase response                                                                                                      | 2.12           | 0.015            | 2.08            | 0.009            |
| GO:0002526 | acute inflammatory response                                                                                               | 1.88           | 0.015            | 2.28            | 0.009            |
| GO:0002250 | adaptive immune response                                                                                                  | 1.52           | 0.024            | 2.59            | 0.009            |
| GO:0002460 | adaptive immune response based on somatic recombination of immune receptors built from immunoglobulin superfamily domains | 1.67           | 0.015            | 2.58            | 0.009            |
| GO:0030534 | adult behavior                                                                                                            | 2.05           | 0.015            | -2.51           | 0.01             |
| GO:0008344 | adult locomotory behavior                                                                                                 | 1.72           | 0.015            | -2.25           | 0.01             |
| GO:0007628 | adult walking behavior                                                                                                    | 1.81           | 0.024            | -2.06           | 0.01             |
| GO:0046631 | alpha-beta T cell activation                                                                                              | 1.39           | 0.089            | 2.38            | 0.009            |
| GO:0046632 | alpha-beta T cell differentiation                                                                                         | 1.22           | 0.285            | 2.06            | 0.009            |
| GO:0046633 | alpha-beta T cell proliferation                                                                                           | 1.28           | 0.29             | 2.18            | 0.009            |
| GO:0015837 | amine transport                                                                                                           | 1.89           | 0.015            | -2.08           | 0.01             |
| GO:0001525 | angiogenesis                                                                                                              | -1.4           | 0.024            | 2.4             | 0.009            |
| GO:0019882 | antigen processing and presentation                                                                                       | 1.12           | 0.44             | 2.7             | 0.009            |
| GO:0019884 | antigen processing and presentation of exogenous antigen                                                                  | 0.78           | 0.898            | 2.45            | 0.009            |
| GO:0002478 | antigen processing and presentation of exogenous peptide antigen                                                          | 1.08           | 0.549            | 2.42            | 0.009            |
| GO:0019886 | antigen processing and presentation of exogenous peptide antigen via MHC class II                                         | 0.88           | 0.768            | 2.25            | 0.009            |

|            |                                                                                           |       |       |       |       |
|------------|-------------------------------------------------------------------------------------------|-------|-------|-------|-------|
| GO:0048002 | antigen processing and presentation of peptide antigen                                    | -1.06 | 0.542 | 2.61  | 0.009 |
| GO:0002474 | antigen processing and presentation of peptide antigen via MHC class I                    | -1.54 | 0.089 | 2.17  | 0.009 |
| GO:0002495 | antigen processing and presentation of peptide antigen via MHC class II                   | 1.11  | 0.497 | 2.42  | 0.009 |
| GO:0002504 | antigen processing and presentation of peptide or polysaccharide antigen via MHC class II | 1.33  | 0.279 | 2.53  | 0.009 |
| GO:0035904 | aorta development                                                                         | -2.08 | 0.015 | 1.6   | 0.051 |
| GO:0043277 | apoptotic cell clearance                                                                  | 1.63  | 0.075 | 2.14  | 0.009 |
| GO:0060840 | artery development                                                                        | -2.12 | 0.015 | 1.72  | 0.009 |
| GO:0048844 | artery morphogenesis                                                                      | -2.05 | 0.015 | 1.77  | 0.009 |
| GO:0008306 | associative learning                                                                      | 1.99  | 0.015 | -2.18 | 0.01  |
| GO:0061564 | axon development                                                                          | 1.85  | 0.015 | -2.18 | 0.011 |
| GO:0007411 | axon guidance                                                                             | 1.46  | 0.048 | -2.08 | 0.011 |
| GO:0007413 | axonal fasciculation                                                                      | 2.07  | 0.015 | -2.15 | 0.01  |
| GO:0007409 | axonogenesis                                                                              | 1.89  | 0.015 | -2.27 | 0.012 |
| GO:0042113 | B cell activation                                                                         | 1.15  | 0.305 | 2.17  | 0.009 |
| GO:0001783 | B cell apoptotic process                                                                  | 0.78  | 0.889 | 2.02  | 0.009 |
| GO:0019724 | B cell mediated immunity                                                                  | 1.26  | 0.24  | 2.5   | 0.009 |
| GO:0042100 | B cell proliferation                                                                      | 1.01  | 0.606 | 2.06  | 0.009 |
| GO:0050853 | B cell receptor signaling pathway                                                         | 0.82  | 0.871 | 2     | 0.009 |
| GO:0007610 | behavior                                                                                  | 2.09  | 0.015 | -1.78 | 0.013 |
| GO:0002209 | behavioral defense response                                                               | 1.48  | 0.115 | -2.33 | 0.01  |
| GO:0001662 | behavioral fear response                                                                  | 1.44  | 0.132 | -2.28 | 0.01  |
| GO:0007596 | blood coagulation                                                                         | -1.23 | 0.203 | 2.21  | 0.009 |
| GO:0001568 | blood vessel development                                                                  | -1.68 | 0.015 | 2.32  | 0.009 |
| GO:0048514 | blood vessel morphogenesis                                                                | -1.57 | 0.015 | 2.34  | 0.009 |
| GO:0001974 | blood vessel remodeling                                                                   | -1.16 | 0.419 | 2     | 0.009 |
| GO:0046849 | bone remodeling                                                                           | -1.31 | 0.139 | 2.05  | 0.009 |
| GO:0017156 | calcium ion-dependent exocytosis                                                          | 2     | 0.015 | -2.33 | 0.01  |
| GO:0048791 | calcium ion-dependent exocytosis of neurotransmitter                                      | 2.14  | 0.015 | -2.51 | 0.01  |
| GO:0070588 | calcium ion transmembrane transport                                                       | 1.43  | 0.054 | -2.18 | 0.01  |
| GO:0072358 | cardiovascular system development                                                         | -1.68 | 0.015 | 2.04  | 0.009 |
| GO:0050432 | catecholamine secretion                                                                   | 1.59  | 0.055 | -2.2  | 0.01  |
| GO:0051937 | catecholamine transport                                                                   | 1.52  | 0.076 | -2.15 | 0.01  |
| GO:0098655 | cation transmembrane transport                                                            | 1.62  | 0.015 | -2.14 | 0.013 |
| GO:0007267 | cell-cell signaling                                                                       | 2.19  | 0.015 | -2.33 | 0.013 |
| GO:0031589 | cell-substrate adhesion                                                                   | -1.76 | 0.015 | 2.14  | 0.009 |
| GO:0001775 | cell activation                                                                           | 1.5   | 0.015 | 2.51  | 0.009 |
| GO:0002263 | cell activation involved in immune response                                               | 1.95  | 0.015 | 2.46  | 0.009 |
| GO:0033627 | cell adhesion mediated by integrin                                                        | 1.04  | 0.568 | 2.23  | 0.009 |
| GO:0060326 | cell chemotaxis                                                                           | 2.24  | 0.015 | 2.65  | 0.009 |
| GO:0021533 | cell differentiation in hindbrain                                                         | 1.25  | 0.342 | -2.02 | 0.01  |
| GO:0001906 | cell killing                                                                              | 2.02  | 0.015 | 2.33  | 0.009 |
| GO:0016477 | cell migration                                                                            | 1.43  | 0.015 | 2     | 0.009 |
| GO:0048667 | cell morphogenesis involved in neuron differentiation                                     | 1.92  | 0.015 | -2.34 | 0.012 |
| GO:0032990 | cell part morphogenesis                                                                   | 1.69  | 0.015 | -2.21 | 0.013 |
| GO:0048858 | cell projection morphogenesis                                                             | 1.73  | 0.015 | -2.27 | 0.013 |
| GO:0008283 | cell proliferation                                                                        | -1.27 | 0.015 | 2.12  | 0.009 |
| GO:1990748 | cellular detoxification                                                                   | -1.43 | 0.188 | 2     | 0.009 |
| GO:0045123 | cellular extravasation                                                                    | 2.2   | 0.015 | 2.23  | 0.009 |
| GO:0071804 | cellular potassium ion transport                                                          | 1.81  | 0.015 | -2.45 | 0.01  |
| GO:0071216 | cellular response to biotic stimulus                                                      | 1.99  | 0.015 | 2.58  | 0.009 |
| GO:0071345 | cellular response to cytokine stimulus                                                    | 2.04  | 0.015 | 2.51  | 0.009 |
| GO:0035690 | cellular response to drug                                                                 | 2.19  | 0.015 | 1.25  | 0.239 |
| GO:0070301 | cellular response to hydrogen peroxide                                                    | 1.56  | 0.053 | 2.12  | 0.009 |
| GO:0071346 | cellular response to interferon-gamma                                                     | 2.33  | 0.015 | 2.18  | 0.009 |
| GO:0071347 | cellular response to interleukin-1                                                        | 2.38  | 0.015 | 2.35  | 0.009 |
| GO:0071396 | cellular response to lipid                                                                | 1.39  | 0.015 | 2.08  | 0.009 |
| GO:0071222 | cellular response to lipopolysaccharide                                                   | 2.06  | 0.015 | 2.49  | 0.009 |
| GO:0071219 | cellular response to molecule of bacterial origin                                         | 2.05  | 0.015 | 2.53  | 0.009 |
| GO:0034614 | cellular response to reactive oxygen species                                              | 1.45  | 0.066 | 2.21  | 0.009 |
| GO:0071356 | cellular response to tumor necrosis factor                                                | 2.04  | 0.015 | 2.27  | 0.009 |
| GO:0071466 | cellular response to xenobiotic stimulus                                                  | -2.02 | 0.015 | 0.97  | 0.63  |
| GO:0021697 | cerebellar cortex formation                                                               | 1.55  | 0.109 | -2.04 | 0.01  |
| GO:0021549 | cerebellum development                                                                    | 1.32  | 0.127 | -2.02 | 0.01  |

|            |                                                                         |       |       |       |       |
|------------|-------------------------------------------------------------------------|-------|-------|-------|-------|
| GO:0070098 | chemokine-mediated signaling pathway                                    | 2.43  | 0.015 | 2.15  | 0.009 |
| GO:0050755 | chemokine metabolic process                                             | 1.98  | 0.015 | 2.02  | 0.009 |
| GO:0032602 | chemokine production                                                    | 1.43  | 0.103 | 2.26  | 0.009 |
| GO:0006935 | chemotaxis                                                              | 2.09  | 0.015 | 1.94  | 0.009 |
| GO:0002544 | chronic inflammatory response                                           | 2.27  | 0.015 | 1.99  | 0.009 |
| GO:0072359 | circulatory system development                                          | -1.68 | 0.015 | 2.04  | 0.009 |
| GO:0050817 | coagulation                                                             | -1.22 | 0.224 | 2.21  | 0.009 |
| GO:0050890 | cognition                                                               | 2.29  | 0.015 | -2.24 | 0.01  |
| GO:0030574 | collagen catabolic process                                              | -1.02 | 0.598 | 2.05  | 0.009 |
| GO:0030199 | collagen fibril organization                                            | -2.23 | 0.015 | 2.09  | 0.009 |
| GO:0032963 | collagen metabolic process                                              | -1.16 | 0.382 | 2.23  | 0.009 |
| GO:0006956 | complement activation                                                   | 1.16  | 0.419 | 2.05  | 0.009 |
| GO:0060026 | convergent extension                                                    | -2.01 | 0.015 | 0.6   | 0.975 |
| GO:0019221 | cytokine-mediated signaling pathway                                     | 2.18  | 0.015 | 2.38  | 0.009 |
| GO:0042089 | cytokine biosynthetic process                                           | 1.85  | 0.024 | 2.58  | 0.009 |
| GO:0042107 | cytokine metabolic process                                              | 1.99  | 0.015 | 2.59  | 0.009 |
| GO:0001816 | cytokine production                                                     | 1.6   | 0.015 | 2.62  | 0.009 |
| GO:0002367 | cytokine production involved in immune response                         | 1.36  | 0.158 | 2.1   | 0.009 |
| GO:0050663 | cytokine secretion                                                      | 1.74  | 0.015 | 2.31  | 0.009 |
| GO:0006952 | defense response                                                        | 1.82  | 0.015 | 2.53  | 0.009 |
| GO:0042742 | defense response to bacterium                                           | 1.78  | 0.015 | 2.6   | 0.009 |
| GO:0050830 | defense response to Gram-positive bacterium                             | 1.51  | 0.058 | 2.32  | 0.009 |
| GO:0098542 | defense response to other organism                                      | 1.45  | 0.015 | 2.36  | 0.009 |
| GO:0042832 | defense response to protozoan                                           | 2.24  | 0.015 | 2     | 0.009 |
| GO:0016358 | dendrite development                                                    | 2     | 0.015 | -2.16 | 0.01  |
| GO:0097484 | dendrite extension                                                      | 2.11  | 0.015 | -2.23 | 0.01  |
| GO:0048813 | dendrite morphogenesis                                                  | 2.07  | 0.015 | -2.35 | 0.01  |
| GO:0097028 | dendritic cell differentiation                                          | 1.24  | 0.348 | 2.03  | 0.009 |
| GO:0060996 | dendritic spine development                                             | 1.82  | 0.024 | -2.24 | 0.01  |
| GO:0060997 | dendritic spine morphogenesis                                           | 2.02  | 0.015 | -2.38 | 0.01  |
| GO:0097061 | dendritic spine organization                                            | 1.9   | 0.015 | -2.28 | 0.01  |
| GO:0009595 | detection of biotic stimulus                                            | 0.9   | 0.736 | 2.15  | 0.009 |
| GO:0098581 | detection of external biotic stimulus                                   | 0.96  | 0.672 | 2.16  | 0.009 |
| GO:0098543 | detection of other organism                                             | 1.34  | 0.295 | 2.02  | 0.009 |
| GO:0098754 | detoxification                                                          | -1.09 | 0.528 | 2.24  | 0.009 |
| GO:0055123 | digestive system development                                            | -2.15 | 0.015 | 1.44  | 0.033 |
| GO:0048565 | digestive tract development                                             | -2.09 | 0.015 | 1.47  | 0.026 |
| GO:0051852 | disruption by host of symbiont cells                                    | 2.01  | 0.015 | 1.88  | 0.009 |
| GO:0044364 | disruption of cells of other organism                                   | 2.15  | 0.015 | 1.89  | 0.013 |
| GO:0051818 | disruption of cells of other organism involved in symbiotic interaction | 2.05  | 0.015 | 1.87  | 0.018 |
| GO:0006261 | DNA-dependent DNA replication                                           | -0.93 | 0.744 | 2.21  | 0.009 |
| GO:0006260 | DNA replication                                                         | -1.08 | 0.436 | 2.3   | 0.009 |
| GO:0006270 | DNA replication initiation                                              | 0.7   | 0.951 | 2.23  | 0.009 |
| GO:0014046 | dopamine secretion                                                      | 1.33  | 0.236 | -2.11 | 0.01  |
| GO:0015872 | dopamine transport                                                      | 1.29  | 0.261 | -2.04 | 0.01  |
| GO:0017144 | drug metabolic process                                                  | -2.06 | 0.015 | 0.95  | 0.654 |
| GO:0035113 | embryonic appendage morphogenesis                                       | -2.03 | 0.015 | 1.2   | 0.219 |
| GO:0030326 | embryonic limb morphogenesis                                            | -2.03 | 0.015 | 1.2   | 0.219 |
| GO:0035987 | endodermal cell differentiation                                         | -1.25 | 0.317 | 2.06  | 0.009 |
| GO:0043542 | endothelial cell migration                                              | -1.47 | 0.043 | 2.01  | 0.009 |
| GO:0051806 | entry into cell of other organism involved in symbiotic interaction     | -1.17 | 0.381 | 2.12  | 0.009 |
| GO:0044409 | entry into host                                                         | -1.17 | 0.381 | 2.12  | 0.009 |
| GO:0030260 | entry into host cell                                                    | -1.17 | 0.381 | 2.12  | 0.009 |
| GO:0051828 | entry into other organism involved in symbiotic interaction             | -1.17 | 0.381 | 2.12  | 0.009 |
| GO:0048245 | eosinophil chemotaxis                                                   | 2.25  | 0.015 | 1.71  | 0.032 |
| GO:0072677 | eosinophil migration                                                    | 2.36  | 0.015 | 1.77  | 0.018 |
| GO:0001837 | epithelial to mesenchymal transition                                    | -2.06 | 0.015 | 1.57  | 0.022 |
| GO:0097480 | establishment of synaptic vesicle localization                          | 2.04  | 0.015 | -2.65 | 0.01  |
| GO:0051650 | establishment of vesicle localization                                   | 1.92  | 0.015 | -2.4  | 0.01  |
| GO:0060079 | excitatory postsynaptic potential                                       | 2.22  | 0.015 | -2.63 | 0.01  |
| GO:0006887 | exocytosis                                                              | 2.35  | 0.015 | -1.87 | 0.011 |
| GO:0035640 | exploration behavior                                                    | 1.61  | 0.089 | -2.26 | 0.01  |
| GO:0085029 | extracellular matrix assembly                                           | -2.08 | 0.015 | 1.44  | 0.116 |
| GO:0030198 | extracellular matrix organization                                       | -2.09 | 0.015 | 2.18  | 0.009 |

|            |                                                                               |       |       |       |       |
|------------|-------------------------------------------------------------------------------|-------|-------|-------|-------|
| GO:0043062 | extracellular structure organization                                          | -2.09 | 0.015 | 2.17  | 0.009 |
| GO:0006635 | fatty acid beta-oxidation                                                     | -2.17 | 0.015 |       |       |
| GO:0009062 | fatty acid catabolic process                                                  | -2.07 | 0.015 |       |       |
| GO:1901570 | fatty acid derivative biosynthetic process                                    | -0.95 | 0.71  | 2.13  | 0.009 |
| GO:1901568 | fatty acid derivative metabolic process                                       | -1.02 | 0.597 | 2.1   | 0.009 |
| GO:0019395 | fatty acid oxidation                                                          | -2.17 | 0.015 | 0.88  | 0.777 |
| GO:0042596 | fear response                                                                 | 1.54  | 0.064 | -2.26 | 0.01  |
| GO:0001660 | fever generation                                                              | 2.17  | 0.024 | 1.8   | 0.033 |
| GO:0042730 | fibrinolysis                                                                  | 1.52  | 0.161 | 2.12  | 0.009 |
| GO:0048144 | fibroblast proliferation                                                      | -1.28 | 0.206 | 2.15  | 0.009 |
| GO:0007216 | G-protein coupled glutamate receptor signaling pathway                        | 2.05  | 0.015 | -2.08 | 0.01  |
| GO:0007214 | gamma-aminobutyric acid signaling pathway                                     | 1.89  | 0.015 | -2.26 | 0.01  |
| GO:0007215 | glutamate receptor signaling pathway                                          | 2.56  | 0.015 | -2.83 | 0.01  |
| GO:0014047 | glutamate secretion                                                           | 2.09  | 0.015 | -1.54 | 0.057 |
| GO:0036230 | granulocyte activation                                                        | 1.8   | 0.039 | 2.06  | 0.013 |
| GO:0071621 | granulocyte chemotaxis                                                        | 2.59  | 0.015 | 2.65  | 0.009 |
| GO:0097530 | granulocyte migration                                                         | 2.6   | 0.015 | 2.68  | 0.009 |
| GO:0031649 | heat generation                                                               | 2.1   | 0.015 | 1.69  | 0.046 |
| GO:0048534 | hematopoietic or lymphoid organ development                                   | 1.13  | 0.208 | 2.08  | 0.009 |
| GO:0030097 | hemopoiesis                                                                   | 1.12  | 0.217 | 2.09  | 0.009 |
| GO:0007599 | hemostasis                                                                    | -1.25 | 0.192 | 2.23  | 0.009 |
| GO:0034113 | heterotypic cell-cell adhesion                                                | 1.57  | 0.094 | 2.26  | 0.009 |
| GO:0021766 | hippocampus development                                                       | 1.61  | 0.032 | -2.18 | 0.01  |
| GO:0007156 | homophilic cell adhesion via plasma membrane adhesion molecules               | 1.44  | 0.073 | -2.11 | 0.01  |
| GO:0034109 | homotypic cell-cell adhesion                                                  | 1.52  | 0.015 | 2.42  | 0.009 |
| GO:0006959 | humoral immune response                                                       | 1.31  | 0.148 | 2.48  | 0.009 |
| GO:0002455 | humoral immune response mediated by circulating immunoglobulin                | 1.44  | 0.163 | 2.12  | 0.009 |
| GO:0002524 | hypersensitivity                                                              | 1.77  | 0.024 | 2.1   | 0.009 |
| GO:0007249 | I-kappaB kinase/NF-kappaB signaling                                           | 1.18  | 0.242 | 2.32  | 0.009 |
| GO:0046456 | icosanoid biosynthetic process                                                | -0.95 | 0.71  | 2.13  | 0.009 |
| GO:0006690 | icosanoid metabolic process                                                   | -1.02 | 0.597 | 2.1   | 0.009 |
| GO:0002252 | immune effector process                                                       | 1.47  | 0.016 | 2.52  | 0.009 |
| GO:0006955 | immune response                                                               | 1.81  | 0.015 | 2.73  | 0.009 |
| GO:0002429 | immune response-activating cell surface receptor signaling pathway            | 1.55  | 0.015 | 2.15  | 0.009 |
| GO:0002757 | immune response-activating signal transduction                                | 1.38  | 0.033 | 2.45  | 0.009 |
| GO:0002768 | immune response-regulating cell surface receptor signaling pathway            | 1.63  | 0.015 | 2.34  | 0.009 |
| GO:0002764 | immune response-regulating signaling pathway                                  | 1.44  | 0.024 | 2.55  | 0.009 |
| GO:0002520 | immune system development                                                     | 1.15  | 0.111 | 2.08  | 0.009 |
| GO:0002376 | immune system process                                                         | 1.45  | 0.015 | 2.47  | 0.009 |
| GO:0016064 | immunoglobulin mediated immune response                                       | 1.18  | 0.324 | 2.53  | 0.009 |
| GO:0002377 | immunoglobulin production                                                     | 1.12  | 0.411 | 2.19  | 0.009 |
| GO:0002381 | immunoglobulin production involved in immunoglobulin mediated immune response | 0.82  | 0.885 | 2.01  | 0.009 |
| GO:0006954 | inflammatory response                                                         | 2.03  | 0.015 | 2.68  | 0.009 |
| GO:0002437 | inflammatory response to antigenic stimulus                                   | 2.18  | 0.015 | 2.13  | 0.009 |
| GO:0045087 | innate immune response                                                        | 1.88  | 0.015 | 2.75  | 0.009 |
| GO:0002758 | innate immune response-activating signal transduction                         | 1.39  | 0.126 | 2.47  | 0.009 |
| GO:0098662 | inorganic cation transmembrane transport                                      | 1.64  | 0.015 | -2.23 | 0.013 |
| GO:0098660 | inorganic ion transmembrane transport                                         | 1.6   | 0.015 | -2.27 | 0.013 |
| GO:0007229 | integrin-mediated signaling pathway                                           | -1.18 | 0.32  | 2.19  | 0.009 |
| GO:0051701 | interaction with host                                                         | 1.21  | 0.284 | 2.22  | 0.009 |
| GO:0051702 | interaction with symbiont                                                     | 2.07  | 0.015 | 2.07  | 0.009 |
| GO:0032608 | interferon-beta production                                                    | -1.03 | 0.597 | 2.13  | 0.009 |
| GO:0042095 | interferon-gamma biosynthetic process                                         | -0.77 | 0.875 | 2.01  | 0.009 |
| GO:0032609 | interferon-gamma production                                                   | 1.79  | 0.015 | 2.21  | 0.009 |
| GO:0032611 | interleukin-1 beta production                                                 | 1.85  | 0.024 | 2.26  | 0.009 |
| GO:0050702 | interleukin-1 beta secretion                                                  | 1.42  | 0.202 | 2.09  | 0.009 |
| GO:0032612 | interleukin-1 production                                                      | 1.68  | 0.038 | 2.24  | 0.009 |
| GO:0050701 | interleukin-1 secretion                                                       | 1.2   | 0.392 | 2     | 0.009 |
| GO:0032613 | interleukin-10 production                                                     | 1.69  | 0.031 | 2.14  | 0.009 |
| GO:0032615 | interleukin-12 production                                                     | 1.45  | 0.152 | 2.22  | 0.009 |
| GO:0042226 | interleukin-6 biosynthetic process                                            | 1.35  | 0.284 | 2     | 0.009 |

|            |                                                                                              |       |       |       |       |
|------------|----------------------------------------------------------------------------------------------|-------|-------|-------|-------|
| GO:0032635 | interleukin-6 production                                                                     | 1.33  | 0.157 | 2.24  | 0.009 |
| GO:0032637 | interleukin-8 production                                                                     | 1.62  | 0.046 | 2.52  | 0.009 |
| GO:0072606 | interleukin-8 secretion                                                                      | 1.21  | 0.41  | 2.07  | 0.009 |
| GO:0044419 | interspecies interaction between organisms                                                   | 1.43  | 0.015 | 2.34  | 0.009 |
| GO:0008630 | intrinsic apoptotic signaling pathway in response to DNA damage                              | -1.24 | 0.224 | 2.13  | 0.009 |
| GO:0034220 | ion transmembrane transport                                                                  | 1.6   | 0.015 | -2.09 | 0.013 |
| GO:0035235 | ionotropic glutamate receptor signaling pathway                                              | 2.07  | 0.024 | -2.19 | 0.01  |
| GO:0051873 | killing by host of symbiont cells                                                            | 2.01  | 0.015 | 1.88  | 0.009 |
| GO:0051883 | killing of cells in other organism involved in symbiotic interaction                         | 2.05  | 0.015 | 1.87  | 0.018 |
| GO:0031640 | killing of cells of other organism                                                           | 2.15  | 0.015 | 1.89  | 0.013 |
| GO:0007612 | learning                                                                                     | 2.3   | 0.015 | -2.41 | 0.01  |
| GO:0007611 | learning or memory                                                                           | 2.25  | 0.015 | -2.35 | 0.01  |
| GO:0045321 | leukocyte activation                                                                         | 1.49  | 0.015 | 2.53  | 0.009 |
| GO:0002366 | leukocyte activation involved in immune response                                             | 1.95  | 0.015 | 2.46  | 0.009 |
| GO:0070486 | leukocyte aggregation                                                                        | 1.59  | 0.015 | 2.51  | 0.009 |
| GO:0071887 | leukocyte apoptotic process                                                                  | 1.18  | 0.319 | 2.46  | 0.009 |
| GO:0007159 | leukocyte cell-cell adhesion                                                                 | 1.69  | 0.015 | 2.53  | 0.009 |
| GO:0030595 | leukocyte chemotaxis                                                                         | 2.48  | 0.015 | 2.72  | 0.009 |
| GO:0043299 | leukocyte degranulation                                                                      | 1.82  | 0.015 | 2.07  | 0.009 |
| GO:0002521 | leukocyte differentiation                                                                    | 1.21  | 0.09  | 2.29  | 0.009 |
| GO:0001776 | leukocyte homeostasis                                                                        | 1.44  | 0.102 | 2.15  | 0.009 |
| GO:0001909 | leukocyte mediated cytotoxicity                                                              | 1.98  | 0.015 | 2.37  | 0.009 |
| GO:0002443 | leukocyte mediated immunity                                                                  | 1.78  | 0.016 | 2.63  | 0.009 |
| GO:0050900 | leukocyte migration                                                                          | 2.37  | 0.015 | 2.74  | 0.009 |
| GO:0070661 | leukocyte proliferation                                                                      | 1.52  | 0.015 | 2.53  | 0.009 |
| GO:0021761 | limbic system development                                                                    | 1.67  | 0.015 | -2.09 | 0.01  |
| GO:0034440 | lipid oxidation                                                                              | -2.15 | 0.015 | 0.92  | 0.731 |
| GO:0031663 | lipopolysaccharide-mediated signaling pathway                                                | 2.02  | 0.015 | 2.15  | 0.009 |
| GO:0007626 | locomotory behavior                                                                          | 1.9   | 0.015 | -2.66 | 0.011 |
| GO:0007616 | long-term memory                                                                             | 1.76  | 0.024 | -2.4  | 0.01  |
| GO:0060291 | long-term synaptic potentiation                                                              | 1.97  | 0.015 | -2.33 | 0.01  |
| GO:0060292 | long term synaptic depression                                                                | 2.09  | 0.015 | -1.85 | 0.01  |
| GO:0046649 | lymphocyte activation                                                                        | 1.41  | 0.015 | 2.45  | 0.009 |
| GO:0002285 | lymphocyte activation involved in immune response                                            | 1.84  | 0.015 | 2.21  | 0.009 |
| GO:0071593 | lymphocyte aggregation                                                                       | 1.45  | 0.015 | 2.48  | 0.009 |
| GO:0070227 | lymphocyte apoptotic process                                                                 | -0.99 | 0.646 | 2.37  | 0.009 |
| GO:0048247 | lymphocyte chemotaxis                                                                        | 2.45  | 0.015 | 2.13  | 0.009 |
| GO:0030098 | lymphocyte differentiation                                                                   | 1.16  | 0.233 | 2.2   | 0.009 |
| GO:0002449 | lymphocyte mediated immunity                                                                 | 1.41  | 0.051 | 2.45  | 0.009 |
| GO:0072676 | lymphocyte migration                                                                         | 2.34  | 0.015 | 2.37  | 0.009 |
| GO:0046651 | lymphocyte proliferation                                                                     | 1.45  | 0.015 | 2.54  | 0.009 |
| GO:0042116 | macrophage activation                                                                        | -1.19 | 0.375 | 2.16  | 0.009 |
| GO:0048246 | macrophage chemotaxis                                                                        | 1.77  | 0.04  | 2.25  | 0.009 |
| GO:0030225 | macrophage differentiation                                                                   | 0.93  | 0.737 | 2.18  | 0.009 |
| GO:0045576 | mast cell activation                                                                         | 1.54  | 0.054 | 2.01  | 0.009 |
| GO:0051899 | membrane depolarization                                                                      | 1.83  | 0.015 | -2.33 | 0.01  |
| GO:0086010 | membrane depolarization during action potential                                              | 2     | 0.015 | -2.37 | 0.01  |
| GO:0010324 | membrane invagination                                                                        | 1.1   | 0.492 | 2.36  | 0.009 |
| GO:0007613 | memory                                                                                       | 2.02  | 0.015 | -2.2  | 0.01  |
| GO:0014031 | mesenchymal cell development                                                                 | -2.11 | 0.015 | 1.59  | 0.009 |
| GO:0048762 | mesenchymal cell differentiation                                                             | -2.1  | 0.015 | 1.59  | 0.009 |
| GO:0072132 | mesenchyme morphogenesis                                                                     | -2.1  | 0.015 | 1.76  | 0.013 |
| GO:0022037 | metencephalon development                                                                    | 1.34  | 0.121 | -2.06 | 0.01  |
| GO:0007067 | mitotic nuclear division                                                                     | -1.17 | 0.23  | 2.03  | 0.009 |
| GO:0051851 | modification by host of symbiont morphology or physiology                                    | 2.07  | 0.015 | 2.06  | 0.009 |
| GO:0035821 | modification of morphology or physiology of other organism                                   | 2.06  | 0.015 | 2.23  | 0.009 |
| GO:0051817 | modification of morphology or physiology of other organism involved in symbiotic interaction | 2.01  | 0.015 | 2.23  | 0.009 |
| GO:0072337 | modified amino acid transport                                                                | -2.03 | 0.015 | -1.57 | 0.053 |
| GO:0098815 | modulation of excitatory postsynaptic potential                                              | 1.88  | 0.031 | -2.49 | 0.01  |
| GO:0050804 | modulation of synaptic transmission                                                          | 2.47  | 0.015 | -2.67 | 0.011 |
| GO:0072329 | monocarboxylic acid catabolic process                                                        | -2.09 | 0.015 |       |       |
| GO:0002548 | monocyte chemotaxis                                                                          | 2.44  | 0.015 | 2.28  | 0.009 |
| GO:0032943 | mononuclear cell proliferation                                                               | 1.44  | 0.024 | 2.55  | 0.009 |

|            |                                                                                         |       |       |       |       |
|------------|-----------------------------------------------------------------------------------------|-------|-------|-------|-------|
| GO:0052192 | movement in environment of other organism involved in symbiotic interaction             | -1.17 | 0.381 | 2.12  | 0.009 |
| GO:0052126 | movement in host environment                                                            | -1.17 | 0.381 | 2.12  | 0.009 |
| GO:0044764 | multi-organism cellular process                                                         | -1.18 | 0.251 | 2.27  | 0.009 |
| GO:0044243 | multicellular organismal catabolic process                                              | -1.05 | 0.575 | 2.05  | 0.009 |
| GO:0044259 | multicellular organismal macromolecule metabolic process                                | -1.14 | 0.429 | 2.21  | 0.009 |
| GO:0044236 | multicellular organismal metabolic process                                              | -1.17 | 0.387 | 2.21  | 0.009 |
| GO:0035637 | multicellular organismal signaling                                                      | 1.72  | 0.024 | -2.12 | 0.01  |
| GO:0002275 | myeloid cell activation involved in immune response                                     | 1.81  | 0.015 | 2.14  | 0.009 |
| GO:0001773 | myeloid dendritic cell activation                                                       | 1.14  | 0.475 | 2.05  | 0.009 |
| GO:0002274 | myeloid leukocyte activation                                                            | 1.66  | 0.015 | 2.56  | 0.009 |
| GO:0002573 | myeloid leukocyte differentiation                                                       | 1.15  | 0.336 | 2.18  | 0.009 |
| GO:0002444 | myeloid leukocyte mediated immunity                                                     | 1.93  | 0.015 | 2.32  | 0.009 |
| GO:0097529 | myeloid leukocyte migration                                                             | 2.46  | 0.015 | 2.7   | 0.009 |
| GO:0070266 | necroptotic process                                                                     | 1.18  | 0.41  | 2.01  | 0.009 |
| GO:0070265 | necrotic cell death                                                                     | 0.96  | 0.697 | 2.02  | 0.009 |
| GO:0016525 | negative regulation of angiogenesis                                                     | 1.45  | 0.095 | 2.07  | 0.009 |
| GO:2000181 | negative regulation of blood vessel morphogenesis                                       | 1.44  | 0.102 | 2.15  | 0.009 |
| GO:0030514 | negative regulation of BMP signaling pathway                                            | -2.02 | 0.015 | 0.82  | 0.865 |
| GO:0090090 | negative regulation of canonical Wnt signaling pathway                                  | -2.13 | 0.015 | 1.17  | 0.319 |
| GO:0022408 | negative regulation of cell-cell adhesion                                               | -1.01 | 0.6   | 2.06  | 0.009 |
| GO:0050866 | negative regulation of cell activation                                                  | 1.19  | 0.305 | 2.18  | 0.009 |
| GO:0007162 | negative regulation of cell adhesion                                                    | -1.16 | 0.287 | 2.08  | 0.009 |
| GO:0042036 | negative regulation of cytokine biosynthetic process                                    | 1.66  | 0.052 | 2.06  | 0.009 |
| GO:0001818 | negative regulation of cytokine production                                              | 1.36  | 0.077 | 2.38  | 0.009 |
| GO:0031348 | negative regulation of defense response                                                 | 1.2   | 0.269 | 2.17  | 0.009 |
| GO:0010951 | negative regulation of endopeptidase activity                                           | 1.61  | 0.024 | 2.17  | 0.009 |
| GO:1902042 | negative regulation of extrinsic apoptotic signaling pathway via death domain receptors | 1.81  | 0.031 | 2.05  | 0.009 |
| GO:0034111 | negative regulation of homotypic cell-cell adhesion                                     | 0.9   | 0.787 | 2.03  | 0.009 |
| GO:0002698 | negative regulation of immune effector process                                          | 1.08  | 0.494 | 2.19  | 0.009 |
| GO:0050777 | negative regulation of immune response                                                  | 1.38  | 0.114 | 2.36  | 0.009 |
| GO:0002683 | negative regulation of immune system process                                            | 1.2   | 0.179 | 2.35  | 0.009 |
| GO:0050728 | negative regulation of inflammatory response                                            | 1.36  | 0.141 | 2.11  | 0.009 |
| GO:0002695 | negative regulation of leukocyte activation                                             | 1.29  | 0.169 | 2.28  | 0.009 |
| GO:2000107 | negative regulation of leukocyte apoptotic process                                      | -1.08 | 0.528 | 2.39  | 0.009 |
| GO:1903038 | negative regulation of leukocyte cell-cell adhesion                                     | 0.89  | 0.81  | 2.14  | 0.009 |
| GO:0002704 | negative regulation of leukocyte mediated immunity                                      | 1.57  | 0.085 | 2.07  | 0.009 |
| GO:0070664 | negative regulation of leukocyte proliferation                                          | 1.27  | 0.251 | 2.13  | 0.009 |
| GO:0051250 | negative regulation of lymphocyte activation                                            | 1.26  | 0.232 | 2.19  | 0.009 |
| GO:0070229 | negative regulation of lymphocyte apoptotic process                                     | -0.9  | 0.745 | 2.1   | 0.009 |
| GO:0050672 | negative regulation of lymphocyte proliferation                                         | 1.11  | 0.458 | 2.16  | 0.009 |
| GO:0032945 | negative regulation of mononuclear cell proliferation                                   | 1.11  | 0.458 | 2.16  | 0.009 |
| GO:0043901 | negative regulation of multi-organism process                                           | 1.42  | 0.083 | 2.36  | 0.009 |
| GO:0032891 | negative regulation of organic acid transport                                           | 2.01  | 0.015 | 1.2   | 0.357 |
| GO:0010466 | negative regulation of peptidase activity                                               | 1.52  | 0.024 | 2.14  | 0.009 |
| GO:0002701 | negative regulation of production of molecular mediator of immune response              | -0.91 | 0.74  | 2.01  | 0.009 |
| GO:1903318 | negative regulation of protein maturation                                               | 1.52  | 0.083 | 2.06  | 0.009 |
| GO:0010955 | negative regulation of protein processing                                               | 1.52  | 0.083 | 2.06  | 0.009 |
| GO:1903035 | negative regulation of response to wounding                                             | 1.35  | 0.12  | 2.18  | 0.009 |
| GO:0050805 | negative regulation of synaptic transmission                                            | 2.02  | 0.015 | -2.14 | 0.01  |
| GO:0050868 | negative regulation of T cell activation                                                | 1.01  | 0.615 | 2.16  | 0.009 |
| GO:1901343 | negative regulation of vasculature development                                          | 1.37  | 0.149 | 2.19  | 0.009 |
| GO:0045071 | negative regulation of viral genome replication                                         | -1.02 | 0.605 | 2.02  | 0.009 |
| GO:1903901 | negative regulation of viral life cycle                                                 | 1.55  | 0.075 | 2.29  | 0.009 |
| GO:0048525 | negative regulation of viral process                                                    | 1.47  | 0.096 | 2.31  | 0.009 |
| GO:0030178 | negative regulation of Wnt signaling pathway                                            | -2.16 | 0.015 | 1.17  | 0.274 |
| GO:0003407 | neural retina development                                                               | 1.29  | 0.24  | -2.09 | 0.01  |
| GO:0050905 | neuromuscular process                                                                   | 2.02  | 0.015 | -2.34 | 0.01  |
| GO:0050885 | neuromuscular process controlling balance                                               | 1.33  | 0.218 | -2.05 | 0.01  |
| GO:0007270 | neuron-neuron synaptic transmission                                                     | 2.31  | 0.015 | -2.99 | 0.01  |
| GO:0048666 | neuron development                                                                      | 1.83  | 0.015 | -2.07 | 0.013 |
| GO:0031175 | neuron projection development                                                           | 1.86  | 0.015 | -2.07 | 0.013 |
| GO:0097485 | neuron projection guidance                                                              | 1.48  | 0.024 | -2.11 | 0.011 |
| GO:0048812 | neuron projection morphogenesis                                                         | 2.01  | 0.015 | -2.39 | 0.012 |

|            |                                                                                                                                                  |       |       |       |       |
|------------|--------------------------------------------------------------------------------------------------------------------------------------------------|-------|-------|-------|-------|
| GO:0008038 | neuron recognition                                                                                                                               | 1.89  | 0.015 | -2.19 | 0.01  |
| GO:0019228 | neuronal action potential                                                                                                                        | 1.96  | 0.015 | -2.08 | 0.01  |
| GO:0007269 | neurotransmitter secretion                                                                                                                       | 2.39  | 0.015 | -2.93 | 0.01  |
| GO:0006836 | neurotransmitter transport                                                                                                                       | 2.15  | 0.015 | -2.83 | 0.011 |
| GO:0030593 | neutrophil chemotaxis                                                                                                                            | 2.58  | 0.015 | 2.63  | 0.009 |
| GO:0002446 | neutrophil mediated immunity                                                                                                                     | 1.93  | 0.015 | 2.21  | 0.009 |
| GO:1990266 | neutrophil migration                                                                                                                             | 2.6   | 0.015 | 2.67  | 0.009 |
| GO:0006809 | nitric oxide biosynthetic process                                                                                                                | 1.85  | 0.024 | 2.13  | 0.009 |
| GO:0046209 | nitric oxide metabolic process                                                                                                                   | 1.8   | 0.024 | 2.13  | 0.009 |
| GO:0035567 | non-canonical Wnt signaling pathway                                                                                                              | -2.16 | 0.015 | 1.37  | 0.164 |
| GO:0002251 | organ or tissue specific immune response                                                                                                         | -0.94 | 0.712 | 2.04  | 0.009 |
| GO:0031100 | organ regeneration                                                                                                                               | -1.14 | 0.357 | 2.21  | 0.009 |
| GO:0007567 | parturition                                                                                                                                      | 1.63  | 0.087 | 2.03  | 0.009 |
| GO:0002221 | pattern recognition receptor signaling pathway                                                                                                   | 1.4   | 0.111 | 2.45  | 0.009 |
| GO:0006909 | phagocytosis                                                                                                                                     | 1.76  | 0.015 | 2.6   | 0.009 |
| GO:0006911 | phagocytosis, engulfment                                                                                                                         | 1.2   | 0.405 | 2.42  | 0.009 |
| GO:0006910 | phagocytosis, recognition                                                                                                                        | 1.09  | 0.536 | 2.06  | 0.009 |
| GO:0042104 | positive regulation of activated T cell proliferation                                                                                            | -1.27 | 0.347 | 2.01  | 0.009 |
| GO:0002675 | positive regulation of acute inflammatory response                                                                                               | 1.94  | 0.015 | 2.16  | 0.009 |
| GO:0002821 | positive regulation of adaptive immune response                                                                                                  | 1.51  | 0.063 | 2.4   | 0.009 |
| GO:0002824 | positive regulation of adaptive immune response based on somatic recombination of immune receptors built from immunoglobulin superfamily domains | 1.53  | 0.049 | 2.36  | 0.009 |
| GO:0046635 | positive regulation of alpha-beta T cell activation                                                                                              | 1.43  | 0.128 | 2.2   | 0.009 |
| GO:0051954 | positive regulation of amine transport                                                                                                           | 1.58  | 0.058 | -2.03 | 0.01  |
| GO:0045766 | positive regulation of angiogenesis                                                                                                              | 1.43  | 0.08  | 2.48  | 0.009 |
| GO:0050871 | positive regulation of B cell activation                                                                                                         | 1.17  | 0.388 | 2.14  | 0.009 |
| GO:0002714 | positive regulation of B cell mediated immunity                                                                                                  | 1.47  | 0.091 | 2.24  | 0.009 |
| GO:0048520 | positive regulation of behavior                                                                                                                  | 2.17  | 0.015 | 2.26  | 0.009 |
| GO:0030194 | positive regulation of blood coagulation                                                                                                         | 2.07  | 0.015 | 2.16  | 0.009 |
| GO:0045956 | positive regulation of calcium ion-dependent exocytosis                                                                                          | 1.88  | 0.015 | -2.13 | 0.01  |
| GO:0022409 | positive regulation of cell-cell adhesion                                                                                                        | 1.7   | 0.015 | 2.38  | 0.009 |
| GO:0050867 | positive regulation of cell activation                                                                                                           | 1.67  | 0.015 | 2.49  | 0.009 |
| GO:0045785 | positive regulation of cell adhesion                                                                                                             | 1.42  | 0.024 | 2.4   | 0.009 |
| GO:0031343 | positive regulation of cell killing                                                                                                              | 2.11  | 0.015 | 2.1   | 0.009 |
| GO:0030335 | positive regulation of cell migration                                                                                                            | 1.77  | 0.015 | 2.33  | 0.009 |
| GO:2000147 | positive regulation of cell motility                                                                                                             | 1.76  | 0.015 | 2.31  | 0.009 |
| GO:0008284 | positive regulation of cell proliferation                                                                                                        | -1.16 | 0.124 | 2.09  | 0.009 |
| GO:0051272 | positive regulation of cellular component movement                                                                                               | 1.75  | 0.015 | 2.29  | 0.009 |
| GO:0032722 | positive regulation of chemokine production                                                                                                      | 1.47  | 0.1   | 2.11  | 0.009 |
| GO:0050921 | positive regulation of chemotaxis                                                                                                                | 2.21  | 0.015 | 2.44  | 0.009 |
| GO:0050820 | positive regulation of coagulation                                                                                                               | 1.99  | 0.015 | 2.23  | 0.009 |
| GO:0042108 | positive regulation of cytokine biosynthetic process                                                                                             | 1.84  | 0.015 | 2.46  | 0.009 |
| GO:0001819 | positive regulation of cytokine production                                                                                                       | 1.79  | 0.015 | 2.58  | 0.009 |
| GO:0050715 | positive regulation of cytokine secretion                                                                                                        | 1.79  | 0.015 | 2.03  | 0.009 |
| GO:0031349 | positive regulation of defense response                                                                                                          | 1.83  | 0.015 | 2.6   | 0.009 |
| GO:1900006 | positive regulation of dendrite development                                                                                                      | 1.64  | 0.024 | -2.05 | 0.01  |
| GO:1903861 | positive regulation of dendrite extension                                                                                                        | 2.11  | 0.015 | -2.3  | 0.01  |
| GO:0060999 | positive regulation of dendritic spine development                                                                                               | 1.52  | 0.105 | -2.25 | 0.01  |
| GO:0061003 | positive regulation of dendritic spine morphogenesis                                                                                             | 1.7   | 0.08  | -2.17 | 0.01  |
| GO:0045807 | positive regulation of endocytosis                                                                                                               | 1.96  | 0.015 | 2.03  | 0.009 |
| GO:0070374 | positive regulation of ERK1 and ERK2 cascade                                                                                                     | 2.18  | 0.015 | 1.89  | 0.009 |
| GO:2000463 | positive regulation of excitatory postsynaptic potential                                                                                         | 2     | 0.015 | -2.41 | 0.01  |
| GO:0048146 | positive regulation of fibroblast proliferation                                                                                                  | -1.22 | 0.327 | 2.22  | 0.009 |
| GO:0071624 | positive regulation of granulocyte chemotaxis                                                                                                    | 1.7   | 0.052 | 2.18  | 0.009 |
| GO:1903708 | positive regulation of hemopoiesis                                                                                                               | 1.49  | 0.024 | 2.21  | 0.009 |
| GO:1900048 | positive regulation of hemostasis                                                                                                                | 2.07  | 0.015 | 2.16  | 0.009 |
| GO:0034112 | positive regulation of homotypic cell-cell adhesion                                                                                              | 1.74  | 0.015 | 2.41  | 0.009 |
| GO:0043123 | positive regulation of I-kappaB kinase/NF-kappaB signaling                                                                                       | -1.06 | 0.52  | 2.38  | 0.009 |
| GO:0002699 | positive regulation of immune effector process                                                                                                   | 1.86  | 0.015 | 2.51  | 0.009 |
| GO:0050778 | positive regulation of immune response                                                                                                           | 1.29  | 0.051 | 2.59  | 0.009 |
| GO:0002684 | positive regulation of immune system process                                                                                                     | 1.75  | 0.015 | 2.69  | 0.009 |
| GO:0002891 | positive regulation of immunoglobulin mediated immune response                                                                                   | 1.47  | 0.091 | 2.24  | 0.009 |
| GO:0002639 | positive regulation of immunoglobulin production                                                                                                 | 1.2   | 0.389 | 2.1   | 0.009 |
| GO:0050729 | positive regulation of inflammatory response                                                                                                     | 2.16  | 0.015 | 2.41  | 0.009 |



|            |                                                                              |       |       |       |       |
|------------|------------------------------------------------------------------------------|-------|-------|-------|-------|
| GO:0045089 | positive regulation of innate immune response                                | 1.17  | 0.291 | 2.48  | 0.009 |
| GO:0032729 | positive regulation of interferon-gamma production                           | 1.67  | 0.024 | 2.07  | 0.009 |
| GO:0032731 | positive regulation of interleukin-1 beta production                         | 1.31  | 0.289 | 2.16  | 0.009 |
| GO:0032732 | positive regulation of interleukin-1 production                              | 1.25  | 0.328 | 2.25  | 0.009 |
| GO:0032755 | positive regulation of interleukin-6 production                              | 1.48  | 0.08  | 2.28  | 0.009 |
| GO:0032757 | positive regulation of interleukin-8 production                              | 1.65  | 0.053 | 2.47  | 0.009 |
| GO:0002696 | positive regulation of leukocyte activation                                  | 1.53  | 0.015 | 2.48  | 0.009 |
| GO:1903039 | positive regulation of leukocyte cell-cell adhesion                          | 1.69  | 0.015 | 2.52  | 0.009 |
| GO:0002690 | positive regulation of leukocyte chemotaxis                                  | 2.33  | 0.015 | 2.59  | 0.009 |
| GO:1902107 | positive regulation of leukocyte differentiation                             | 1.51  | 0.024 | 2.25  | 0.009 |
| GO:0001912 | positive regulation of leukocyte mediated cytotoxicity                       | 2.05  | 0.015 | 2.1   | 0.009 |
| GO:0002705 | positive regulation of leukocyte mediated immunity                           | 1.97  | 0.015 | 2.26  | 0.009 |
| GO:0002687 | positive regulation of leukocyte migration                                   | 2.4   | 0.015 | 2.66  | 0.009 |
| GO:0070665 | positive regulation of leukocyte proliferation                               | 1.46  | 0.047 | 2.42  | 0.009 |
| GO:0040017 | positive regulation of locomotion                                            | 1.75  | 0.015 | 2.28  | 0.009 |
| GO:0051251 | positive regulation of lymphocyte activation                                 | 1.48  | 0.024 | 2.41  | 0.009 |
| GO:0045621 | positive regulation of lymphocyte differentiation                            | 1.47  | 0.094 | 2.08  | 0.009 |
| GO:0002708 | positive regulation of lymphocyte mediated immunity                          | 1.53  | 0.033 | 2.09  | 0.009 |
| GO:2000403 | positive regulation of lymphocyte migration                                  | 2     | 0.015 | 2.08  | 0.009 |
| GO:0050671 | positive regulation of lymphocyte proliferation                              | 1.5   | 0.04  | 2.4   | 0.009 |
| GO:0045651 | positive regulation of macrophage differentiation                            | 0.89  | 0.746 | 2     | 0.009 |
| GO:0090026 | positive regulation of monocyte chemotaxis                                   | 2.13  | 0.015 | 2.21  | 0.009 |
| GO:0032946 | positive regulation of mononuclear cell proliferation                        | 1.49  | 0.039 | 2.41  | 0.009 |
| GO:0043902 | positive regulation of multi-organism process                                | 0.81  | 0.953 | 2.07  | 0.009 |
| GO:0045639 | positive regulation of myeloid cell differentiation                          | 1.05  | 0.552 | 2.01  | 0.009 |
| GO:0002763 | positive regulation of myeloid leukocyte differentiation                     | 1.21  | 0.353 | 2.08  | 0.009 |
| GO:0002888 | positive regulation of myeloid leukocyte mediated immunity                   | 1.79  | 0.039 | 2.09  | 0.009 |
| GO:0010976 | positive regulation of neuron projection development                         | 1.73  | 0.015 | -2.16 | 0.011 |
| GO:0001956 | positive regulation of neurotransmitter secretion                            | 1.69  | 0.065 | -2.16 | 0.01  |
| GO:0051590 | positive regulation of neurotransmitter transport                            | 1.68  | 0.047 | -2.16 | 0.01  |
| GO:0090023 | positive regulation of neutrophil chemotaxis                                 | 1.69  | 0.031 | 2.17  | 0.009 |
| GO:1902624 | positive regulation of neutrophil migration                                  | 1.82  | 0.031 | 2.24  | 0.009 |
| GO:0051092 | positive regulation of NF-kappaB transcription factor activity               | 1.18  | 0.322 | 2.03  | 0.009 |
| GO:0045429 | positive regulation of nitric oxide biosynthetic process                     | 2.12  | 0.015 | 2     | 0.009 |
| GO:1904407 | positive regulation of nitric oxide metabolic process                        | 2.12  | 0.015 | 2     | 0.009 |
| GO:0050766 | positive regulation of phagocytosis                                          | 1.97  | 0.015 | 2.45  | 0.009 |
| GO:0002702 | positive regulation of production of molecular mediator of immune response   | 1.29  | 0.227 | 2.21  | 0.009 |
| GO:1903428 | positive regulation of reactive oxygen species biosynthetic process          | 2.09  | 0.024 | 2.01  | 0.009 |
| GO:2000379 | positive regulation of reactive oxygen species metabolic process             | 2.07  | 0.015 | 2.32  | 0.009 |
| GO:0002833 | positive regulation of response to biotic stimulus                           | 1.38  | 0.2   | 2.06  | 0.009 |
| GO:0032103 | positive regulation of response to external stimulus                         | 2.11  | 0.015 | 2.53  | 0.009 |
| GO:0048584 | positive regulation of response to stimulus                                  | 1.37  | 0.015 | 2.04  | 0.009 |
| GO:1903036 | positive regulation of response to wounding                                  | 2.19  | 0.015 | 2.4   | 0.009 |
| GO:0051965 | positive regulation of synapse assembly                                      | 2.07  | 0.015 | -2.61 | 0.01  |
| GO:0050806 | positive regulation of synaptic transmission                                 | 2.36  | 0.015 | -2.57 | 0.01  |
| GO:0051968 | positive regulation of synaptic transmission, glutamatergic                  | 1.9   | 0.024 | -2.09 | 0.01  |
| GO:0002827 | positive regulation of T-helper 1 type immune response                       | 1.68  | 0.083 | 2.04  | 0.009 |
| GO:0050870 | positive regulation of T cell activation                                     | 1.63  | 0.015 | 2.48  | 0.009 |
| GO:0045582 | positive regulation of T cell differentiation                                | 1.68  | 0.041 | 2.02  | 0.009 |
| GO:2000406 | positive regulation of T cell migration                                      | 1.55  | 0.134 | 2     | 0.009 |
| GO:0042102 | positive regulation of T cell proliferation                                  | 1.6   | 0.024 | 2.46  | 0.009 |
| GO:0042535 | positive regulation of tumor necrosis factor biosynthetic process            | 1.64  | 0.07  | 2.19  | 0.009 |
| GO:0032760 | positive regulation of tumor necrosis factor production                      | 1.81  | 0.015 | 2.7   | 0.009 |
| GO:1903557 | positive regulation of tumor necrosis factor superfamily cytokine production | 1.78  | 0.015 | 2.72  | 0.009 |
| GO:0032481 | positive regulation of type I interferon production                          | -1.19 | 0.385 | 2.05  | 0.009 |
| GO:0010575 | positive regulation of vascular endothelial growth factor production         | 1.88  | 0.015 | 2.14  | 0.009 |
| GO:1904018 | positive regulation of vasculature development                               | 1.39  | 0.101 | 2.48  | 0.009 |
| GO:0090303 | positive regulation of wound healing                                         | 1.93  | 0.015 | 2.11  | 0.009 |
| GO:0043368 | positive T cell selection                                                    | 1.48  | 0.14  | 2.06  | 0.009 |
| GO:0071805 | potassium ion transmembrane transport                                        | 1.81  | 0.015 | -2.45 | 0.01  |

|            |                                                                                                                                         |       |       |       |       |
|------------|-----------------------------------------------------------------------------------------------------------------------------------------|-------|-------|-------|-------|
| GO:0006813 | potassium ion transport                                                                                                                 | 1.88  | 0.015 | -2.36 | 0.01  |
| GO:0097090 | presynaptic membrane organization                                                                                                       | 1.37  | 0.221 | -2.2  | 0.01  |
| GO:0002532 | production of molecular mediator involved in inflammatory response                                                                      | 0.93  | 0.737 | 2.2   | 0.009 |
| GO:0002440 | production of molecular mediator of immune response                                                                                     | 1.32  | 0.11  | 2.35  | 0.009 |
| GO:0001516 | prostaglandin biosynthetic process                                                                                                      | 0.85  | 0.814 | 2.01  | 0.009 |
| GO:0006693 | prostaglandin metabolic process                                                                                                         | -0.93 | 0.72  | 2.21  | 0.009 |
| GO:0046457 | prostanoid biosynthetic process                                                                                                         | 0.85  | 0.814 | 2.01  | 0.009 |
| GO:0006692 | prostanoid metabolic process                                                                                                            | -0.93 | 0.72  | 2.21  | 0.009 |
| GO:0072376 | protein activation cascade                                                                                                              | 1.1   | 0.474 | 2.16  | 0.009 |
| GO:0035418 | protein localization to synapse                                                                                                         | 1.78  | 0.059 | -2.25 | 0.01  |
| GO:2001057 | reactive nitrogen species metabolic process                                                                                             | 1.72  | 0.024 | 2.17  | 0.009 |
| GO:1903409 | reactive oxygen species biosynthetic process                                                                                            | 1.76  | 0.024 | 2.12  | 0.009 |
| GO:0072593 | reactive oxygen species metabolic process                                                                                               | 1.56  | 0.015 | 2.35  | 0.009 |
| GO:0031099 | regeneration                                                                                                                            | -1.25 | 0.166 | 2.1   | 0.009 |
| GO:0002673 | regulation of acute inflammatory response                                                                                               | 1.66  | 0.015 | 2.16  | 0.009 |
| GO:0002819 | regulation of adaptive immune response                                                                                                  | 1.55  | 0.033 | 2.44  | 0.009 |
| GO:0002822 | regulation of adaptive immune response based on somatic recombination of immune receptors built from immunoglobulin superfamily domains | 1.54  | 0.033 | 2.38  | 0.009 |
| GO:2000311 | regulation of alpha-amino-3-hydroxy-5-methyl-4-isoxazole propionate selective glutamate receptor activity                               | 2.05  | 0.015 | -2.16 | 0.01  |
| GO:0046634 | regulation of alpha-beta T cell activation                                                                                              | 1.39  | 0.136 | 2.28  | 0.009 |
| GO:0046640 | regulation of alpha-beta T cell proliferation                                                                                           | 1.42  | 0.167 | 2.05  | 0.009 |
| GO:0051952 | regulation of amine transport                                                                                                           | 1.93  | 0.015 | -2.08 | 0.01  |
| GO:0045765 | regulation of angiogenesis                                                                                                              | 1.36  | 0.061 | 2.51  | 0.009 |
| GO:0002577 | regulation of antigen processing and presentation                                                                                       | 1.18  | 0.466 | 2.16  | 0.009 |
| GO:0050854 | regulation of antigen receptor-mediated signaling pathway                                                                               | -0.74 | 0.945 | 2.09  | 0.009 |
| GO:0050864 | regulation of B cell activation                                                                                                         | 1.35  | 0.123 | 2.22  | 0.009 |
| GO:0002902 | regulation of B cell apoptotic process                                                                                                  | 0.92  | 0.724 | 2.02  | 0.009 |
| GO:0002712 | regulation of B cell mediated immunity                                                                                                  | 1.51  | 0.07  | 2.16  | 0.009 |
| GO:0030888 | regulation of B cell proliferation                                                                                                      | 1.02  | 0.565 | 2.11  | 0.009 |
| GO:0030193 | regulation of blood coagulation                                                                                                         | 1.33  | 0.199 | 2.07  | 0.009 |
| GO:0017158 | regulation of calcium ion-dependent exocytosis                                                                                          | 2.09  | 0.015 | -2.34 | 0.01  |
| GO:0050433 | regulation of catecholamine secretion                                                                                                   | 1.53  | 0.082 | -2.19 | 0.01  |
| GO:0022407 | regulation of cell-cell adhesion                                                                                                        | 1.43  | 0.015 | 2.29  | 0.009 |
| GO:0010810 | regulation of cell-substrate adhesion                                                                                                   | -1.56 | 0.031 | 2.04  | 0.009 |
| GO:0050865 | regulation of cell activation                                                                                                           | 1.45  | 0.015 | 2.42  | 0.009 |
| GO:0030155 | regulation of cell adhesion                                                                                                             | 1.23  | 0.078 | 2.29  | 0.009 |
| GO:0033628 | regulation of cell adhesion mediated by integrin                                                                                        | 1.04  | 0.589 | 2.33  | 0.009 |
| GO:0031341 | regulation of cell killing                                                                                                              | 1.95  | 0.015 | 2.07  | 0.009 |
| GO:0030334 | regulation of cell migration                                                                                                            | 1.47  | 0.015 | 2.19  | 0.009 |
| GO:2000145 | regulation of cell motility                                                                                                             | 1.43  | 0.015 | 2.19  | 0.009 |
| GO:0042127 | regulation of cell proliferation                                                                                                        | -1.33 | 0.015 | 2.11  | 0.009 |
| GO:0051270 | regulation of cellular component movement                                                                                               | 1.4   | 0.015 | 2.06  | 0.009 |
| GO:0002691 | regulation of cellular extravasation                                                                                                    | 1.93  | 0.015 | 2.03  | 0.009 |
| GO:0032642 | regulation of chemokine production                                                                                                      | 1.44  | 0.096 | 2.28  | 0.009 |
| GO:0050920 | regulation of chemotaxis                                                                                                                | 1.95  | 0.015 | 2.37  | 0.009 |
| GO:0050818 | regulation of coagulation                                                                                                               | 1.3   | 0.207 | 2.08  | 0.009 |
| GO:2000116 | regulation of cysteine-type endopeptidase activity                                                                                      | 1.47  | 0.031 | 2     | 0.009 |
| GO:0043281 | regulation of cysteine-type endopeptidase activity involved in apoptotic process                                                        | 1.44  | 0.046 | 2.04  | 0.009 |
| GO:0001959 | regulation of cytokine-mediated signaling pathway                                                                                       | -0.99 | 0.653 | 2.13  | 0.009 |
| GO:0042035 | regulation of cytokine biosynthetic process                                                                                             | 1.91  | 0.024 | 2.57  | 0.009 |
| GO:0001817 | regulation of cytokine production                                                                                                       | 1.6   | 0.015 | 2.64  | 0.009 |
| GO:0002718 | regulation of cytokine production involved in immune response                                                                           | 1.07  | 0.504 | 2.13  | 0.009 |
| GO:0050707 | regulation of cytokine secretion                                                                                                        | 1.64  | 0.015 | 2.24  | 0.009 |
| GO:0031347 | regulation of defense response                                                                                                          | 1.57  | 0.016 | 2.38  | 0.009 |
| GO:0050773 | regulation of dendrite development                                                                                                      | 1.89  | 0.015 | -2.23 | 0.01  |
| GO:1903859 | regulation of dendrite extension                                                                                                        | 2.11  | 0.015 | -2.3  | 0.01  |
| GO:0048814 | regulation of dendrite morphogenesis                                                                                                    | 1.95  | 0.015 | -2.28 | 0.01  |
| GO:0060998 | regulation of dendritic spine development                                                                                               | 1.64  | 0.033 | -2.2  | 0.01  |
| GO:0061001 | regulation of dendritic spine morphogenesis                                                                                             | 1.81  | 0.024 | -2.26 | 0.01  |
| GO:0014059 | regulation of dopamine secretion                                                                                                        | 1.33  | 0.236 | -2.11 | 0.01  |
| GO:0052548 | regulation of endopeptidase activity                                                                                                    | 1.48  | 0.015 | 2.13  | 0.009 |

|            |                                                                                |       |       |       |       |
|------------|--------------------------------------------------------------------------------|-------|-------|-------|-------|
| GO:0010717 | regulation of epithelial to mesenchymal transition                             | -2.02 | 0.015 | 1.42  | 0.103 |
| GO:0090175 | regulation of establishment of planar polarity                                 | -2.23 | 0.015 | 1.68  | 0.023 |
| GO:0017157 | regulation of exocytosis                                                       | 2.22  | 0.015 | -1.87 | 0.011 |
| GO:1902041 | regulation of extrinsic apoptotic signaling pathway via death domain receptors | 1.64  | 0.024 | 2.03  | 0.009 |
| GO:0048145 | regulation of fibroblast proliferation                                         | -1.24 | 0.25  | 2.14  | 0.009 |
| GO:1900449 | regulation of glutamate receptor signaling pathway                             | 2.22  | 0.015 | -2.5  | 0.01  |
| GO:0014048 | regulation of glutamate secretion                                              | 2     | 0.015 | -1.35 | 0.19  |
| GO:0071622 | regulation of granulocyte chemotaxis                                           | 2.05  | 0.015 | 2.25  | 0.009 |
| GO:1903706 | regulation of hemopoiesis                                                      | 1.23  | 0.129 | 2.07  | 0.009 |
| GO:1900046 | regulation of hemostasis                                                       | 1.33  | 0.199 | 2.07  | 0.009 |
| GO:0034110 | regulation of homotypic cell-cell adhesion                                     | 1.48  | 0.015 | 2.34  | 0.009 |
| GO:0002920 | regulation of humoral immune response                                          | 1.08  | 0.512 | 2.11  | 0.009 |
| GO:0043122 | regulation of I-kappaB kinase/NF-kappaB signaling                              | 1.04  | 0.512 | 2.3   | 0.009 |
| GO:0002697 | regulation of immune effector process                                          | 1.33  | 0.035 | 2.2   | 0.009 |
| GO:0050776 | regulation of immune response                                                  | 1.28  | 0.043 | 2.66  | 0.009 |
| GO:0002682 | regulation of immune system process                                            | 1.5   | 0.016 | 2.45  | 0.009 |
| GO:0002889 | regulation of immunoglobulin mediated immune response                          | 1.51  | 0.07  | 2.16  | 0.009 |
| GO:0002637 | regulation of immunoglobulin production                                        | 1.34  | 0.207 | 2.11  | 0.009 |
| GO:0050727 | regulation of inflammatory response                                            | 1.8   | 0.015 | 2.5   | 0.009 |
| GO:0045088 | regulation of innate immune response                                           | 1.22  | 0.236 | 2.53  | 0.009 |
| GO:0032648 | regulation of interferon-beta production                                       | -1.04 | 0.58  | 2.1   | 0.009 |
| GO:0032649 | regulation of interferon-gamma production                                      | 1.72  | 0.015 | 2.25  | 0.009 |
| GO:0032651 | regulation of interleukin-1 beta production                                    | 1.46  | 0.138 | 2.15  | 0.009 |
| GO:0032652 | regulation of interleukin-1 production                                         | 1.33  | 0.216 | 2.19  | 0.009 |
| GO:0032653 | regulation of interleukin-10 production                                        | 1.65  | 0.039 | 2.09  | 0.009 |
| GO:0032655 | regulation of interleukin-12 production                                        | 1.52  | 0.091 | 2.22  | 0.009 |
| GO:0045408 | regulation of interleukin-6 biosynthetic process                               | 1.35  | 0.269 | 2.01  | 0.009 |
| GO:0032675 | regulation of interleukin-6 production                                         | 1.33  | 0.158 | 2.25  | 0.009 |
| GO:0032677 | regulation of interleukin-8 production                                         | 1.65  | 0.053 | 2.52  | 0.009 |
| GO:2000482 | regulation of interleukin-8 secretion                                          | 1.23  | 0.405 | 2.03  | 0.009 |
| GO:0034765 | regulation of ion transmembrane transport                                      | 2.05  | 0.015 | -2.26 | 0.012 |
| GO:0032412 | regulation of ion transmembrane transporter activity                           | 1.71  | 0.015 | -2.11 | 0.01  |
| GO:0043269 | regulation of ion transport                                                    | 2.02  | 0.015 | -1.95 | 0.012 |
| GO:0002694 | regulation of leukocyte activation                                             | 1.4   | 0.015 | 2.47  | 0.009 |
| GO:2000106 | regulation of leukocyte apoptotic process                                      | -1.01 | 0.604 | 2.36  | 0.009 |
| GO:1903037 | regulation of leukocyte cell-cell adhesion                                     | 1.41  | 0.049 | 2.47  | 0.009 |
| GO:0002688 | regulation of leukocyte chemotaxis                                             | 2.22  | 0.015 | 2.61  | 0.009 |
| GO:0043300 | regulation of leukocyte degranulation                                          | 1.55  | 0.093 | 2.09  | 0.009 |
| GO:1902105 | regulation of leukocyte differentiation                                        | 1.24  | 0.178 | 2.21  | 0.009 |
| GO:0001910 | regulation of leukocyte mediated cytotoxicity                                  | 1.91  | 0.015 | 2.1   | 0.009 |
| GO:0002703 | regulation of leukocyte mediated immunity                                      | 1.84  | 0.015 | 2.49  | 0.009 |
| GO:0002685 | regulation of leukocyte migration                                              | 2.29  | 0.015 | 2.66  | 0.009 |
| GO:0070663 | regulation of leukocyte proliferation                                          | 1.52  | 0.015 | 2.55  | 0.009 |
| GO:0040012 | regulation of locomotion                                                       | 1.5   | 0.015 | 2.14  | 0.009 |
| GO:0048169 | regulation of long-term neuronal synaptic plasticity                           | 2.26  | 0.015 | -2.21 | 0.01  |
| GO:0051249 | regulation of lymphocyte activation                                            | 1.39  | 0.025 | 2.44  | 0.009 |
| GO:0070228 | regulation of lymphocyte apoptotic process                                     | -1.02 | 0.58  | 2.3   | 0.009 |
| GO:1901623 | regulation of lymphocyte chemotaxis                                            | 2.22  | 0.015 | 1.99  | 0.009 |
| GO:0045619 | regulation of lymphocyte differentiation                                       | 1.26  | 0.212 | 2.04  | 0.009 |
| GO:0002706 | regulation of lymphocyte mediated immunity                                     | 1.34  | 0.148 | 2.17  | 0.009 |
| GO:2000401 | regulation of lymphocyte migration                                             | 2.12  | 0.015 | 2.27  | 0.009 |
| GO:0050670 | regulation of lymphocyte proliferation                                         | 1.5   | 0.015 | 2.56  | 0.009 |
| GO:0010758 | regulation of macrophage chemotaxis                                            | 1.75  | 0.053 | 2.07  | 0.009 |
| GO:0045649 | regulation of macrophage differentiation                                       | 0.91  | 0.722 | 2.05  | 0.009 |
| GO:0042391 | regulation of membrane potential                                               | 2.08  | 0.015 | -2.56 | 0.011 |
| GO:0090025 | regulation of monocyte chemotaxis                                              | 2.01  | 0.015 | 2.1   | 0.009 |
| GO:0032944 | regulation of mononuclear cell proliferation                                   | 1.49  | 0.015 | 2.57  | 0.009 |
| GO:0043900 | regulation of multi-organism process                                           | 1.14  | 0.277 | 2.07  | 0.009 |
| GO:0002761 | regulation of myeloid leukocyte differentiation                                | 1.04  | 0.523 | 2.13  | 0.009 |
| GO:0002886 | regulation of myeloid leukocyte mediated immunity                              | 1.8   | 0.024 | 2.3   | 0.009 |
| GO:2000310 | regulation of N-methyl-D-aspartate selective glutamate receptor activity       | 1.92  | 0.024 | -2.33 | 0.01  |
| GO:0010975 | regulation of neuron projection development                                    | 1.82  | 0.015 | -2.13 | 0.012 |
| GO:0048168 | regulation of neuronal synaptic plasticity                                     | 2.42  | 0.015 | -2.22 | 0.01  |
| GO:0001505 | regulation of neurotransmitter levels                                          | 2.21  | 0.015 | -2.78 | 0.01  |

|            |                                                                     |       |       |       |       |
|------------|---------------------------------------------------------------------|-------|-------|-------|-------|
| GO:0046928 | regulation of neurotransmitter secretion                            | 2     | 0.015 | -2.56 | 0.01  |
| GO:0051588 | regulation of neurotransmitter transport                            | 1.94  | 0.015 | -2.35 | 0.01  |
| GO:0090022 | regulation of neutrophil chemotaxis                                 | 1.67  | 0.038 | 2.11  | 0.009 |
| GO:1902622 | regulation of neutrophil migration                                  | 1.81  | 0.024 | 2.24  | 0.009 |
| GO:0045428 | regulation of nitric oxide biosynthetic process                     | 1.9   | 0.024 | 2.11  | 0.009 |
| GO:2000027 | regulation of organ morphogenesis                                   | -2.12 | 0.015 | 1.68  | 0.009 |
| GO:0052547 | regulation of peptidase activity                                    | 1.34  | 0.031 | 2.15  | 0.009 |
| GO:0050764 | regulation of phagocytosis                                          | 1.95  | 0.015 | 2.44  | 0.009 |
| GO:0060078 | regulation of postsynaptic membrane potential                       | 2.29  | 0.015 | -2.67 | 0.01  |
| GO:0043266 | regulation of potassium ion transport                               | 1.44  | 0.091 | -2.02 | 0.01  |
| GO:0002700 | regulation of production of molecular mediator of immune response   | 1.27  | 0.227 | 2.31  | 0.009 |
| GO:1903317 | regulation of protein maturation                                    | 1.22  | 0.307 | 2.06  | 0.009 |
| GO:0070613 | regulation of protein processing                                    | 1.23  | 0.292 | 2.07  | 0.009 |
| GO:1903426 | regulation of reactive oxygen species biosynthetic process          | 1.85  | 0.024 | 2.03  | 0.009 |
| GO:2000377 | regulation of reactive oxygen species metabolic process             | 1.78  | 0.015 | 2.23  | 0.009 |
| GO:0060759 | regulation of response to cytokine stimulus                         | -1    | 0.637 | 2.13  | 0.009 |
| GO:0032101 | regulation of response to external stimulus                         | 1.6   | 0.016 | 2.09  | 0.009 |
| GO:0080134 | regulation of response to stress                                    | 1.37  | 0.015 | 2.02  | 0.009 |
| GO:1903034 | regulation of response to wounding                                  | 1.67  | 0.015 | 2.4   | 0.009 |
| GO:0060390 | regulation of SMAD protein import into nucleus                      | -2.08 | 0.015 | 1.81  | 0.013 |
| GO:2000736 | regulation of stem cell differentiation                             | -2.22 | 0.015 | 1.71  | 0.009 |
| GO:2000036 | regulation of stem cell population maintenance                      | -2.06 | 0.015 | 1.62  | 0.044 |
| GO:0090322 | regulation of superoxide metabolic process                          | 1.22  | 0.396 | 2.14  | 0.009 |
| GO:0043903 | regulation of symbiosis, encompassing mutualism through parasitism  | 1.38  | 0.078 | 2.4   | 0.009 |
| GO:0051963 | regulation of synapse assembly                                      | 2.14  | 0.015 | -2.72 | 0.01  |
| GO:0050807 | regulation of synapse organization                                  | 2     | 0.015 | -2.61 | 0.01  |
| GO:0050803 | regulation of synapse structure or activity                         | 2.42  | 0.015 | -2.62 | 0.011 |
| GO:0048167 | regulation of synaptic plasticity                                   | 2.49  | 0.015 | -2.45 | 0.01  |
| GO:0032228 | regulation of synaptic transmission, GABAergic                      | 1.6   | 0.071 | -2.12 | 0.01  |
| GO:0051966 | regulation of synaptic transmission, glutamatergic                  | 1.95  | 0.015 | -2.75 | 0.01  |
| GO:2000300 | regulation of synaptic vesicle exocytosis                           | 1.94  | 0.031 | -2.04 | 0.01  |
| GO:1902803 | regulation of synaptic vesicle transport                            | 2     | 0.024 | -2.16 | 0.01  |
| GO:0002825 | regulation of T-helper 1 type immune response                       | 1.67  | 0.053 | 2.2   | 0.009 |
| GO:0050863 | regulation of T cell activation                                     | 1.39  | 0.056 | 2.46  | 0.009 |
| GO:0070232 | regulation of T cell apoptotic process                              | -1.36 | 0.2   | 2.03  | 0.009 |
| GO:0045580 | regulation of T cell differentiation                                | 1.4   | 0.09  | 2.04  | 0.009 |
| GO:2000404 | regulation of T cell migration                                      | 1.5   | 0.144 | 2.1   | 0.009 |
| GO:0042129 | regulation of T cell proliferation                                  | 1.5   | 0.015 | 2.53  | 0.009 |
| GO:0034121 | regulation of toll-like receptor signaling pathway                  | 1.26  | 0.319 | 2.04  | 0.009 |
| GO:0034762 | regulation of transmembrane transport                               | 1.99  | 0.015 | -2.24 | 0.011 |
| GO:0022898 | regulation of transmembrane transporter activity                    | 1.67  | 0.015 | -2.09 | 0.01  |
| GO:0032409 | regulation of transporter activity                                  | 1.62  | 0.015 | -2.05 | 0.01  |
| GO:0042534 | regulation of tumor necrosis factor biosynthetic process            | 1.9   | 0.024 | 2.27  | 0.009 |
| GO:0032680 | regulation of tumor necrosis factor production                      | 1.71  | 0.015 | 2.67  | 0.009 |
| GO:1903555 | regulation of tumor necrosis factor superfamily cytokine production | 1.74  | 0.015 | 2.68  | 0.009 |
| GO:0002828 | regulation of type 2 immune response                                | 1.81  | 0.024 | 2.09  | 0.009 |
| GO:0032479 | regulation of type I interferon production                          | 1.01  | 0.616 | 2.23  | 0.009 |
| GO:0010574 | regulation of vascular endothelial growth factor production         | 2.29  | 0.015 | 2.24  | 0.009 |
| GO:1901342 | regulation of vasculature development                               | 1.27  | 0.137 | 2.54  | 0.009 |
| GO:0060627 | regulation of vesicle-mediated transport                            | 2.12  | 0.015 | 1.34  | 0.031 |
| GO:0046596 | regulation of viral entry into host cell                            | 1.43  | 0.197 | 2.07  | 0.009 |
| GO:0045069 | regulation of viral genome replication                              | -0.94 | 0.722 | 2.11  | 0.009 |
| GO:1903900 | regulation of viral life cycle                                      | 1.27  | 0.185 | 2.28  | 0.009 |
| GO:0050792 | regulation of viral process                                         | 1.2   | 0.276 | 2.29  | 0.009 |
| GO:0061041 | regulation of wound healing                                         | 1.25  | 0.232 | 2.06  | 0.009 |
| GO:0019430 | removal of superoxide radicals                                      | -1.08 | 0.559 | 2.11  | 0.009 |
| GO:0033198 | response to ATP                                                     | 2.02  | 0.015 | 1.69  | 0.023 |
| GO:0009617 | response to bacterium                                               | 1.97  | 0.015 | 2.61  | 0.009 |
| GO:0009607 | response to biotic stimulus                                         | 1.72  | 0.015 | 2.48  | 0.009 |
| GO:0042220 | response to cocaine                                                 | 1.75  | 0.024 | -2.07 | 0.01  |
| GO:0031960 | response to corticosteroid                                          | 1.49  | 0.015 | 2.03  | 0.009 |
| GO:0034097 | response to cytokine                                                | 2.09  | 0.015 | 2.53  | 0.009 |
| GO:0043207 | response to external biotic stimulus                                | 1.75  | 0.015 | 2.48  | 0.009 |

|            |                                                      |       |       |       |       |
|------------|------------------------------------------------------|-------|-------|-------|-------|
| GO:0034405 | response to fluid shear stress                       | 1     | 0.612 | 2.02  | 0.009 |
| GO:0060992 | response to fungicide                                | 1.61  | 0.065 | -2.13 | 0.01  |
| GO:0009620 | response to fungus                                   | 2.27  | 0.015 | 2.24  | 0.009 |
| GO:0010332 | response to gamma radiation                          | 2.15  | 0.015 | 2.14  | 0.009 |
| GO:0051384 | response to glucocorticoid                           | 1.55  | 0.015 | 2.06  | 0.009 |
| GO:0009629 | response to gravity                                  | 2.05  | 0.015 | 1.35  | 0.22  |
| GO:0042542 | response to hydrogen peroxide                        | 1.62  | 0.015 | 2.22  | 0.009 |
| GO:0055093 | response to hyperoxia                                | 1.45  | 0.08  | 2.24  | 0.009 |
| GO:0036296 | response to increased oxygen levels                  | 1.45  | 0.08  | 2.24  | 0.009 |
| GO:0035455 | response to interferon-alpha                         | -1.55 | 0.109 | 2.02  | 0.009 |
| GO:0034341 | response to interferon-gamma                         | 2.18  | 0.015 | 2.38  | 0.009 |
| GO:0070555 | response to interleukin-1                            | 2.36  | 0.015 | 2.22  | 0.009 |
| GO:0070670 | response to interleukin-4                            | 1.35  | 0.255 | 2     | 0.009 |
| GO:0070741 | response to interleukin-6                            | 1.86  | 0.024 | 2.01  | 0.009 |
| GO:0010212 | response to ionizing radiation                       | 1.72  | 0.015 | 2.12  | 0.009 |
| GO:0034616 | response to laminar fluid shear stress               | -0.98 | 0.652 | 2.01  | 0.009 |
| GO:0033993 | response to lipid                                    | 1.39  | 0.015 | 2.08  | 0.009 |
| GO:0032496 | response to lipopolysaccharide                       | 2.01  | 0.015 | 2.54  | 0.009 |
| GO:0055094 | response to lipoprotein particle                     | 1.97  | 0.015 | 2.02  | 0.009 |
| GO:0002237 | response to molecule of bacterial origin             | 1.98  | 0.015 | 2.56  | 0.009 |
| GO:0051707 | response to other organism                           | 1.75  | 0.015 | 2.49  | 0.009 |
| GO:0000305 | response to oxygen radical                           | -1.17 | 0.463 | 2.03  | 0.009 |
| GO:0036119 | response to platelet-derived growth factor           | 1.56  | 0.115 | 2.01  | 0.009 |
| GO:0001562 | response to protozoan                                | 2.2   | 0.015 | 1.97  | 0.009 |
| GO:0000302 | response to reactive oxygen species                  | 1.6   | 0.024 | 2.23  | 0.009 |
| GO:0006950 | response to stress                                   | 1.26  | 0.015 | 2.09  | 0.009 |
| GO:0000303 | response to superoxide                               | -1.24 | 0.372 | 2.01  | 0.009 |
| GO:0034612 | response to tumor necrosis factor                    | 2.04  | 0.015 | 2.34  | 0.009 |
| GO:0009615 | response to virus                                    | 1.13  | 0.317 | 2     | 0.009 |
| GO:0009611 | response to wounding                                 | 1.43  | 0.015 | 2.4   | 0.009 |
| GO:0001878 | response to yeast                                    | 2.06  | 0.015 | 1.81  | 0.009 |
| GO:0010043 | response to zinc ion                                 | 1.48  | 0.087 | 2.05  | 0.009 |
| GO:0010842 | retina layer formation                               | -1    | 0.61  | -2.02 | 0.01  |
| GO:0042573 | retinoic acid metabolic process                      | -1.79 | 0.031 | 2.06  | 0.009 |
| GO:0000028 | ribosomal small subunit assembly                     | -1.05 | 0.563 | 2.04  | 0.009 |
| GO:0042274 | ribosomal small subunit biogenesis                   | 0.95  | 0.709 | 2.12  | 0.009 |
| GO:0042254 | ribosome biogenesis                                  | 1.56  | 0.024 | 2.11  | 0.009 |
| GO:0019233 | sensory perception of pain                           | 2.04  | 0.015 | -1.79 | 0.01  |
| GO:0007210 | serotonin receptor signaling pathway                 | 1.9   | 0.024 | -2.04 | 0.01  |
| GO:0023061 | signal release                                       | 2.04  | 0.015 | -2.23 | 0.012 |
| GO:0044708 | single-organism behavior                             | 2.21  | 0.015 | -2.41 | 0.012 |
| GO:0098602 | single organism cell adhesion                        | 1.41  | 0.015 | 2.32  | 0.009 |
| GO:0016337 | single organismal cell-cell adhesion                 | 1.53  | 0.015 | 2.29  | 0.009 |
| GO:0007184 | SMAD protein import into nucleus                     | -2.06 | 0.015 | 1.6   | 0.056 |
| GO:0035725 | sodium ion transmembrane transport                   | 1.45  | 0.074 | -2.04 | 0.01  |
| GO:0001964 | startle response                                     | 1.99  | 0.015 | -2.26 | 0.01  |
| GO:0048864 | stem cell development                                | -2.03 | 0.015 | 1.67  | 0.009 |
| GO:0042554 | superoxide anion generation                          | 1.45  | 0.216 | 2.05  | 0.009 |
| GO:0006801 | superoxide metabolic process                         | 1.24  | 0.305 | 2.31  | 0.009 |
| GO:0044403 | symbiosis, encompassing mutualism through parasitism | 1.43  | 0.015 | 2.34  | 0.009 |
| GO:0007416 | synapse assembly                                     | 2.23  | 0.015 | -2.85 | 0.01  |
| GO:0050808 | synapse organization                                 | 2.09  | 0.015 | -2.75 | 0.011 |
| GO:0007268 | synaptic transmission                                | 2.5   | 0.015 | -2.86 | 0.012 |
| GO:0051932 | synaptic transmission, GABAergic                     | 1.88  | 0.015 | -2.55 | 0.01  |
| GO:0035249 | synaptic transmission, glutamatergic                 | 2.24  | 0.015 | -2.9  | 0.01  |
| GO:0016079 | synaptic vesicle exocytosis                          | 2.24  | 0.015 | -2.73 | 0.01  |
| GO:0097479 | synaptic vesicle localization                        | 2.08  | 0.015 | -2.69 | 0.01  |
| GO:0016082 | synaptic vesicle priming                             | 1.94  | 0.015 | -2.21 | 0.01  |
| GO:0036465 | synaptic vesicle recycling                           | 1.55  | 0.059 | -2.12 | 0.01  |
| GO:0048489 | synaptic vesicle transport                           | 2.04  | 0.015 | -2.65 | 0.01  |
| GO:0042088 | T-helper 1 type immune response                      | 1.74  | 0.024 | 2.4   | 0.009 |
| GO:0042110 | T cell activation                                    | 1.45  | 0.015 | 2.48  | 0.009 |
| GO:0002286 | T cell activation involved in immune response        | 2.09  | 0.015 | 2.23  | 0.009 |
| GO:0070489 | T cell aggregation                                   | 1.45  | 0.015 | 2.48  | 0.009 |
| GO:0070231 | T cell apoptotic process                             | -1.14 | 0.44  | 2.13  | 0.009 |
| GO:0010818 | T cell chemotaxis                                    | 2.04  | 0.015 | 1.92  | 0.009 |

|            |                                                       |       |       |       |       |
|------------|-------------------------------------------------------|-------|-------|-------|-------|
| GO:0030217 | T cell differentiation                                | 1.37  | 0.046 | 2.22  | 0.009 |
| GO:0033077 | T cell differentiation in thymus                      | 0.99  | 0.642 | 2.05  | 0.009 |
| GO:0002456 | T cell mediated immunity                              | 1.26  | 0.25  | 2.01  | 0.009 |
| GO:0072678 | T cell migration                                      | 2.15  | 0.015 | 2.3   | 0.009 |
| GO:0042098 | T cell proliferation                                  | 1.49  | 0.024 | 2.54  | 0.009 |
| GO:0045058 | T cell selection                                      | 1.15  | 0.459 | 2.2   | 0.009 |
| GO:0042330 | taxis                                                 | 2.09  | 0.015 | 1.94  | 0.009 |
| GO:0046653 | tetrahydrofolate metabolic process                    | 0.97  | 0.67  | 2.07  | 0.009 |
| GO:0071594 | thymocyte aggregation                                 | 0.99  | 0.642 | 2.05  | 0.009 |
| GO:0048771 | tissue remodeling                                     | -1.42 | 0.049 | 2.35  | 0.009 |
| GO:0002224 | toll-like receptor signaling pathway                  | 1.28  | 0.274 | 2.25  | 0.009 |
| GO:0006412 | translation                                           | 0.88  | 0.986 | 2.04  | 0.009 |
| GO:0019226 | transmission of nerve impulse                         | 2.36  | 0.015 | -2.27 | 0.01  |
| GO:0042533 | tumor necrosis factor biosynthetic process            | 1.9   | 0.024 | 2.27  | 0.009 |
| GO:0032640 | tumor necrosis factor production                      | 1.71  | 0.024 | 2.67  | 0.009 |
| GO:0071706 | tumor necrosis factor superfamily cytokine production | 1.74  | 0.015 | 2.67  | 0.009 |
| GO:0042092 | type 2 immune response                                | 1.89  | 0.015 | 2.06  | 0.009 |
| GO:0032606 | type I interferon production                          | 0.97  | 0.681 | 2.24  | 0.009 |
| GO:0006636 | unsaturated fatty acid biosynthetic process           | -0.81 | 0.913 | 2.03  | 0.009 |
| GO:0033559 | unsaturated fatty acid metabolic process              | -1.04 | 0.58  | 2.04  | 0.009 |
| GO:0010573 | vascular endothelial growth factor production         | 2.29  | 0.015 | 2.23  | 0.009 |
| GO:0001944 | vasculature development                               | -1.68 | 0.015 | 2.31  | 0.009 |
| GO:0051648 | vesicle localization                                  | 1.95  | 0.015 | -2.41 | 0.01  |
| GO:0046718 | viral entry into host cell                            | -1.15 | 0.416 | 2.14  | 0.009 |
| GO:0019058 | viral life cycle                                      | 1.1   | 0.436 | 2.2   | 0.009 |
| GO:0016032 | viral process                                         | -1.16 | 0.316 | 2.25  | 0.009 |
| GO:0007632 | visual behavior                                       | 1.41  | 0.148 | -2.03 | 0.01  |
| GO:0008542 | visual learning                                       | 1.41  | 0.152 | -2.05 | 0.01  |
| GO:0090659 | walking behavior                                      | 1.81  | 0.024 | -2.06 | 0.01  |
| GO:0060071 | Wnt signaling pathway, planar cell polarity pathway   | -2.21 | 0.015 | 1.67  | 0.023 |
| GO:0042060 | wound healing                                         | -1.32 | 0.042 | 2.31  | 0.009 |

**Supplementary Table 5: Overlap of GO terms (molecular function) with significant positive or negative enrichment in GSEA at either 6 or 24 hrs post-FUS (versus contralateral hemisphere) with ORA**

| Post-FUS Time Point                | GO ID                              | GO Description                                         | Gene Ratio | Background Ratio | Adjusted p-value |
|------------------------------------|------------------------------------|--------------------------------------------------------|------------|------------------|------------------|
| Upregulated genes 6 hrs Post-FUS   | GO:0048020                         | CCR chemokine receptor binding                         | 4/57       | 30/19509         | 0.0001           |
|                                    | GO:0008009                         | chemokine activity                                     | 6/57       | 36/19509         | 0.00000          |
|                                    | GO:0042379                         | chemokine receptor binding                             | 6/57       | 48/19509         | 0.00000          |
|                                    | GO:0005125                         | cytokine activity                                      | 9/57       | 185/19509        | 0.00000          |
|                                    | GO:0005126                         | cytokine receptor binding                              | 9/57       | 253/19509        | 0.00000          |
|                                    | GO:0001664                         | G-protein coupled receptor binding                     | 8/57       | 255/19509        | 0.00004          |
|                                    | GO:0005102                         | receptor binding                                       | 16/57      | 1428/19509       | 0.0001           |
| Downregulated genes 6 hrs Post-FUS | GO:0008509                         | anion transmembrane transporter activity               | 9/88       | 260/19509        | 0.0001           |
|                                    | GO:0005518                         | collagen binding                                       | 6/88       | 65/19509         | 0.0001           |
|                                    | GO:0005201                         | extracellular matrix structural constituent            | 4/88       | 38/19509         | 0.001            |
|                                    | GO:0005539                         | glycosaminoglycan binding                              | 8/88       | 173/19509        | 0.0001           |
|                                    | GO:0008201                         | heparin binding                                        | 7/88       | 133/19509        | 0.0001           |
|                                    | GO:0008028                         | monocarboxylic acid transmembrane transporter activity | 4/88       | 38/19509         | 0.001            |
|                                    | GO:0008514                         | organic anion transmembrane transporter activity       | 7/88       | 158/19509        | 0.0003           |
|                                    | GO:1901681                         | sulfur compound binding                                | 11/88      | 224/19509        | 0.00000          |
| GO:0022857                         | transmembrane transporter activity | 17/88                                                  | 960/19509  | 0.0001           |                  |
| Upregulated genes 24 hrs Post-FUS  | GO:0005215                         | transporter activity                                   | 17/88      | 1209/19509       | 0.001            |
|                                    | GO:0019956                         | chemokine binding                                      | 4/84       | 16/19509         | 0.0001           |
|                                    | GO:0019955                         | cytokine binding                                       | 6/84       | 87/19509         | 0.0002           |
|                                    | GO:00051021                        | receptor binding                                       | 19/84      | 1428/19509       | 0.0004           |

**Supplementary Table 6: Overlap of GO terms (biological process) with significant positive or negative enrichment in GSEA at either 6 or 24 hrs post-FUS (versus contralateral hemisphere) with ORA**

| Post-FUS Time Point              | GO ID      | GO Description                                                                                                            | Gene Ratio | Background Ratio | Adjusted P-value |
|----------------------------------|------------|---------------------------------------------------------------------------------------------------------------------------|------------|------------------|------------------|
| Upregulated genes 6 hrs Post-FUS | GO:0002526 | acute inflammatory response                                                                                               | 5/59       | 125/19509        | 0.0004           |
|                                  | GO:0002460 | adaptive immune response based on somatic recombination of immune receptors built from immunoglobulin superfamily domains | 6/59       | 211/19509        | 0.0004           |
|                                  | GO:0001525 | angiogenesis                                                                                                              | 8/59       | 391/19509        | 0.0003           |
|                                  | GO:0043277 | apoptotic cell clearance                                                                                                  | 3/59       | 30/19509         | 0.001            |
|                                  | GO:0007610 | behavior                                                                                                                  | 16/59      | 788/19509        | 0.00000          |
|                                  | GO:0001568 | blood vessel development                                                                                                  | 10/59      | 552/19509        | 0.0001           |
|                                  | GO:0048514 | blood vessel morphogenesis                                                                                                | 9/59       | 477/19509        | 0.0002           |
|                                  | GO:0072358 | cardiovascular system development                                                                                         | 11/59      | 937/19509        | 0.001            |
|                                  | GO:0001775 | cell activation                                                                                                           | 11/59      | 799/19509        | 0.0003           |
|                                  | GO:0060326 | cell chemotaxis                                                                                                           | 10/59      | 216/19509        | 0.00000          |
|                                  | GO:0016477 | cell migration                                                                                                            | 15/59      | 1108/19509       | 0.00002          |
|                                  | GO:0008283 | cell proliferation                                                                                                        | 19/59      | 1828/19509       | 0.00002          |
|                                  | GO:0045123 | cellular extravasation                                                                                                    | 4/59       | 44/19509         | 0.0001           |
|                                  | GO:0071216 | cellular response to biotic stimulus                                                                                      | 11/59      | 236/19509        | 0                |
|                                  | GO:0071345 | cellular response to cytokine stimulus                                                                                    | 14/59      | 509/19509        | 0.00000          |
|                                  | GO:0071346 | cellular response to interferon-gamma                                                                                     | 5/59       | 70/19509         | 0.00004          |
|                                  | GO:0071347 | cellular response to interleukin-1                                                                                        | 8/59       | 96/19509         | 0.00000          |
|                                  | GO:0071396 | cellular response to lipid                                                                                                | 12/59      | 527/19509        | 0.00000          |
|                                  | GO:0071222 | cellular response to lipopolysaccharide                                                                                   | 11/59      | 206/19509        | 0                |
|                                  | GO:0071219 | cellular response to molecule of bacterial origin                                                                         | 11/59      | 216/19509        | 0                |
|                                  | GO:0034614 | cellular response to reactive oxygen species                                                                              | 6/59       | 144/19509        | 0.0001           |
|                                  | GO:0071356 | cellular response to tumor necrosis factor                                                                                | 7/59       | 145/19509        | 0.00001          |
|                                  | GO:0070098 | chemokine-mediated signaling pathway                                                                                      | 6/59       | 67/19509         | 0.00000          |
|                                  | GO:0050755 | chemokine metabolic process                                                                                               | 3/59       | 13/19509         | 0.0001           |
|                                  | GO:0006935 | chemotaxis                                                                                                                | 12/59      | 446/19509        | 0.00000          |
|                                  | GO:0002544 | chronic inflammatory response                                                                                             | 3/59       | 29/19509         | 0.001            |
|                                  | GO:0072359 | circulatory system development                                                                                            | 11/59      | 937/19509        | 0.001            |
|                                  | GO:0050890 | cognition                                                                                                                 | 7/59       | 282/19509        | 0.0003           |
|                                  | GO:0019221 | cytokine-mediated signaling pathway                                                                                       | 10/59      | 292/19509        | 0.00000          |
|                                  | GO:0001816 | cytokine production                                                                                                       | 13/59      | 557/19509        | 0.00000          |
|                                  | GO:0050663 | cytokine secretion                                                                                                        | 7/59       | 153/19509        | 0.00001          |
|                                  | GO:0006952 | defense response                                                                                                          | 22/59      | 1191/19509       | 0                |
|                                  | GO:0048245 | eosinophil chemotaxis                                                                                                     | 4/59       | 18/19509         | 0.00001          |
|                                  | GO:0072677 | eosinophil migration                                                                                                      | 4/59       | 22/19509         | 0.00001          |
|                                  | GO:0071621 | granulocyte chemotaxis                                                                                                    | 7/59       | 87/19509         | 0.00000          |
|                                  | GO:0097530 | granulocyte migration                                                                                                     | 7/59       | 98/19509         | 0.00000          |
|                                  | GO:0048534 | hematopoietic or lymphoid organ development                                                                               | 12/59      | 816/19509        | 0.0001           |
|                                  | GO:0030097 | hemopoiesis                                                                                                               | 11/59      | 765/19509        | 0.0002           |
|                                  | GO:0002252 | immune effector process                                                                                                   | 10/59      | 624/19509        | 0.0002           |
|                                  | GO:0006955 | immune response                                                                                                           | 20/59      | 1030/19509       | 0                |
|                                  | GO:0002520 | immune system development                                                                                                 | 14/59      | 862/19509        | 0.00001          |
|                                  | GO:0002376 | immune system process                                                                                                     | 29/59      | 2040/19509       | 0                |
|                                  | GO:0006954 | inflammatory response                                                                                                     | 16/59      | 540/19509        | 0                |
|                                  | GO:0045087 | innate immune response                                                                                                    | 14/59      | 471/19509        | 0                |
|                                  | GO:0051702 | interaction with symbiont                                                                                                 | 4/59       | 54/19509         | 0.0003           |
|                                  | GO:0044419 | interspecies interaction between organisms                                                                                | 7/59       | 283/19509        | 0.0003           |
|                                  | GO:0007612 | learning                                                                                                                  | 6/59       | 148/19509        | 0.0001           |
|                                  | GO:0007611 | learning or memory                                                                                                        | 7/59       | 251/19509        | 0.0001           |
|                                  | GO:0045321 | leukocyte activation                                                                                                      | 10/59      | 678/19509        | 0.0004           |
|                                  | GO:0030595 | leukocyte chemotaxis                                                                                                      | 9/59       | 159/19509        | 0.00000          |
|                                  | GO:0002521 | leukocyte differentiation                                                                                                 | 9/59       | 456/19509        | 0.0001           |
|                                  | GO:0050900 | leukocyte migration                                                                                                       | 11/59      | 253/19509        | 0.00000          |
|                                  | GO:0031663 | lipopolysaccharide-mediated signaling pathway                                                                             | 5/59       | 47/19509         | 0.00001          |
|                                  | GO:0048247 | lymphocyte chemotaxis                                                                                                     | 5/59       | 40/19509         | 0.00000          |
|                                  | GO:0072676 | lymphocyte migration                                                                                                      | 5/59       | 65/19509         | 0.00003          |
|                                  | GO:0048246 | macrophage chemotaxis                                                                                                     | 3/59       | 27/19509         | 0.001            |
|                                  | GO:0051851 | modification by host of symbiont morphology or physiology                                                                 | 4/59       | 51/19509         | 0.0002           |

|            |                                                                                              |       |            |         |
|------------|----------------------------------------------------------------------------------------------|-------|------------|---------|
| GO:0035821 | modification of morphology or physiology of other organism                                   | 5/59  | 82/19509   | 0.0001  |
| GO:0051817 | modification of morphology or physiology of other organism involved in symbiotic interaction | 5/59  | 76/19509   | 0.0001  |
| GO:0002548 | monocyte chemotaxis                                                                          | 5/59  | 45/19509   | 0.00001 |
| GO:0002573 | myeloid leukocyte differentiation                                                            | 6/59  | 188/19509  | 0.0003  |
| GO:0002444 | myeloid leukocyte mediated immunity                                                          | 5/59  | 82/19509   | 0.0001  |
| GO:0097529 | myeloid leukocyte migration                                                                  | 8/59  | 143/19509  | 0.00000 |
| GO:0043901 | negative regulation of multi-organism process                                                | 5/59  | 147/19509  | 0.001   |
| GO:0030593 | neutrophil chemotaxis                                                                        | 7/59  | 75/19509   | 0.00000 |
| GO:0002446 | neutrophil mediated immunity                                                                 | 3/59  | 28/19509   | 0.001   |
| GO:1990266 | neutrophil migration                                                                         | 7/59  | 84/19509   | 0.00000 |
| GO:0006809 | nitric oxide biosynthetic process                                                            | 4/59  | 66/19509   | 0.0005  |
| GO:0046209 | nitric oxide metabolic process                                                               | 4/59  | 70/19509   | 0.001   |
| GO:0006909 | phagocytosis                                                                                 | 5/59  | 138/19509  | 0.001   |
| GO:0002675 | positive regulation of acute inflammatory response                                           | 3/59  | 30/19509   | 0.001   |
| GO:0045766 | positive regulation of angiogenesis                                                          | 5/59  | 124/19509  | 0.0004  |
| GO:0048520 | positive regulation of behavior                                                              | 8/59  | 148/19509  | 0.00000 |
| GO:0030335 | positive regulation of cell migration                                                        | 10/59 | 383/19509  | 0.00001 |
| GO:2000147 | positive regulation of cell motility                                                         | 10/59 | 394/19509  | 0.00001 |
| GO:0008284 | positive regulation of cell proliferation                                                    | 11/59 | 854/19509  | 0.0005  |
| GO:0051272 | positive regulation of cellular component movement                                           | 10/59 | 403/19509  | 0.00001 |
| GO:0050921 | positive regulation of chemotaxis                                                            | 8/59  | 120/19509  | 0.00000 |
| GO:0001819 | positive regulation of cytokine production                                                   | 9/59  | 334/19509  | 0.00002 |
| GO:0031349 | positive regulation of defense response                                                      | 10/59 | 252/19509  | 0.00000 |
| GO:0045807 | positive regulation of endocytosis                                                           | 7/59  | 124/19509  | 0.00000 |
| GO:0070374 | positive regulation of ERK1 and ERK2 cascade                                                 | 7/59  | 156/19509  | 0.00001 |
| GO:1903708 | positive regulation of hemopoiesis                                                           | 8/59  | 165/19509  | 0.00000 |
| GO:0002684 | positive regulation of immune system process                                                 | 19/59 | 690/19509  | 0       |
| GO:0050729 | positive regulation of inflammatory response                                                 | 6/59  | 93/19509   | 0.00001 |
| GO:0002690 | positive regulation of leukocyte chemotaxis                                                  | 8/59  | 78/19509   | 0       |
| GO:1902107 | positive regulation of leukocyte differentiation                                             | 7/59  | 131/19509  | 0.00000 |
| GO:0002687 | positive regulation of leukocyte migration                                                   | 10/59 | 115/19509  | 0       |
| GO:0040017 | positive regulation of locomotion                                                            | 10/59 | 414/19509  | 0.00001 |
| GO:0002763 | positive regulation of myeloid leukocyte differentiation                                     | 4/59  | 56/19509   | 0.0003  |
| GO:0045429 | positive regulation of nitric oxide biosynthetic process                                     | 4/59  | 41/19509   | 0.0001  |
| GO:1904407 | positive regulation of nitric oxide metabolic process                                        | 4/59  | 41/19509   | 0.0001  |
| GO:0050766 | positive regulation of phagocytosis                                                          | 4/59  | 57/19509   | 0.0003  |
| GO:1903428 | positive regulation of reactive oxygen species biosynthetic process                          | 4/59  | 48/19509   | 0.0002  |
| GO:2000379 | positive regulation of reactive oxygen species metabolic process                             | 5/59  | 88/19509   | 0.0001  |
| GO:0032103 | positive regulation of response to external stimulus                                         | 10/59 | 263/19509  | 0.00000 |
| GO:0048584 | positive regulation of response to stimulus                                                  | 16/59 | 1688/19509 | 0.0003  |
| GO:1903036 | positive regulation of response to wounding                                                  | 6/59  | 141/19509  | 0.0001  |
| GO:1904018 | positive regulation of vasculature development                                               | 5/59  | 133/19509  | 0.001   |
| GO:2001057 | reactive nitrogen species metabolic process                                                  | 4/59  | 74/19509   | 0.001   |
| GO:0072593 | reactive oxygen species metabolic process                                                    | 6/59  | 232/19509  | 0.001   |
| GO:0045765 | regulation of angiogenesis                                                                   | 7/59  | 205/19509  | 0.00005 |
| GO:0030334 | regulation of cell migration                                                                 | 11/59 | 638/19509  | 0.0001  |
| GO:2000145 | regulation of cell motility                                                                  | 11/59 | 671/19509  | 0.0001  |
| GO:0042127 | regulation of cell proliferation                                                             | 19/59 | 1501/19509 | 0.00000 |
| GO:0051270 | regulation of cellular component movement                                                    | 11/59 | 749/19509  | 0.0002  |
| GO:0050920 | regulation of chemotaxis                                                                     | 8/59  | 161/19509  | 0.00000 |
| GO:0001817 | regulation of cytokine production                                                            | 12/59 | 502/19509  | 0.00000 |
| GO:0050707 | regulation of cytokine secretion                                                             | 6/59  | 134/19509  | 0.0001  |
| GO:0031347 | regulation of defense response                                                               | 11/59 | 537/19509  | 0.00001 |
| GO:1903706 | regulation of hemopoiesis                                                                    | 8/59  | 322/19509  | 0.0001  |
| GO:0002682 | regulation of immune system process                                                          | 20/59 | 1089/19509 | 0       |
| GO:0050727 | regulation of inflammatory response                                                          | 7/59  | 248/19509  | 0.0001  |
| GO:0043269 | regulation of ion transport                                                                  | 10/59 | 621/19509  | 0.0002  |
| GO:0002688 | regulation of leukocyte chemotaxis                                                           | 8/59  | 94/19509   | 0.00000 |
| GO:1902105 | regulation of leukocyte differentiation                                                      | 7/59  | 231/19509  | 0.0001  |
| GO:0002685 | regulation of leukocyte migration                                                            | 10/59 | 151/19509  | 0       |



|                                    |             |                                                                                                                           |       |            |         |
|------------------------------------|-------------|---------------------------------------------------------------------------------------------------------------------------|-------|------------|---------|
|                                    | GO:0040012  | regulation of locomotion                                                                                                  | 13/59 | 744/19509  | 0.00001 |
|                                    | GO:1901623  | regulation of lymphocyte chemotaxis                                                                                       | 3/59  | 19/19509   | 0.0003  |
|                                    | GO:0045428  | regulation of nitric oxide biosynthetic process                                                                           | 4/59  | 56/19509   | 0.0003  |
|                                    | GO:0050764  | regulation of phagocytosis                                                                                                | 4/59  | 76/19509   | 0.001   |
|                                    | GO:1903426  | regulation of reactive oxygen species biosynthetic process                                                                | 4/59  | 68/19509   | 0.001   |
|                                    | GO:2000377  | regulation of reactive oxygen species metabolic process                                                                   | 6/59  | 154/19509  | 0.0001  |
|                                    | GO:0032101  | regulation of response to external stimulus                                                                               | 13/59 | 790/19509  | 0.00001 |
|                                    | GO:0010574  | regulation of vascular endothelial growth factor production                                                               | 4/59  | 30/19509   | 0.00004 |
|                                    | GO:1901342  | regulation of vasculature development                                                                                     | 7/59  | 222/19509  | 0.0001  |
|                                    | GO:0033198  | response to ATP                                                                                                           | 3/59  | 31/19509   | 0.001   |
|                                    | GO:0009617  | response to bacterium                                                                                                     | 20/59 | 608/19509  | 0       |
|                                    | GO:0009607  | response to biotic stimulus                                                                                               | 24/59 | 938/19509  | 0       |
|                                    | GO:0031960  | response to corticosteroid                                                                                                | 9/59  | 274/19509  | 0.00000 |
|                                    | GO:0034097  | response to cytokine                                                                                                      | 22/59 | 644/19509  | 0       |
|                                    | GO:0043207  | response to external biotic stimulus                                                                                      | 24/59 | 909/19509  | 0       |
|                                    | GO:0010332  | response to gamma radiation                                                                                               | 5/59  | 64/19509   | 0.00003 |
|                                    | GO:0051384  | response to glucocorticoid                                                                                                | 9/59  | 254/19509  | 0.00000 |
|                                    | GO:0009629  | response to gravity                                                                                                       | 3/59  | 18/19509   | 0.0003  |
|                                    | GO:0042542  | response to hydrogen peroxide                                                                                             | 6/59  | 154/19509  | 0.0001  |
|                                    | GO:0034341  | response to interferon-gamma                                                                                              | 5/59  | 93/19509   | 0.0001  |
|                                    | GO:0070555  | response to interleukin-1                                                                                                 | 9/59  | 127/19509  | 0       |
|                                    | GO:0033993  | response to lipid                                                                                                         | 22/59 | 1108/19509 | 0       |
|                                    | GO:0032496  | response to lipopolysaccharide                                                                                            | 19/59 | 403/19509  | 0       |
|                                    | GO:0055094  | response to lipoprotein particle                                                                                          | 3/59  | 17/19509   | 0.0002  |
|                                    | GO:0002237  | response to molecule of bacterial origin                                                                                  | 19/59 | 418/19509  | 0       |
|                                    | GO:0051707  | response to other organism                                                                                                | 24/59 | 907/19509  | 0       |
|                                    | GO:0000302  | response to reactive oxygen species                                                                                       | 8/59  | 237/19509  | 0.00001 |
|                                    | GO:0006950  | response to stress                                                                                                        | 29/59 | 3260/19509 | 0.00000 |
|                                    | GO:0034612  | response to tumor necrosis factor                                                                                         | 8/59  | 169/19509  | 0.00000 |
|                                    | GO:0009611  | response to wounding                                                                                                      | 11/59 | 728/19509  | 0.0001  |
|                                    | GO:0044708  | single-organism behavior                                                                                                  | 8/59  | 477/19509  | 0.001   |
|                                    | GO:0044403  | symbiosis, encompassing mutualism through parasitism                                                                      | 7/59  | 283/19509  | 0.0003  |
|                                    | GO:0042330  | taxis                                                                                                                     | 12/59 | 447/19509  | 0.00000 |
|                                    | GO:0010573  | vascular endothelial growth factor production                                                                             | 4/59  | 32/19509   | 0.00005 |
|                                    | GO:0001944  | vasculature development                                                                                                   | 10/59 | 576/19509  | 0.0001  |
| Downregulated genes 6 hrs Post-FUS | GO:00713961 | cellular response to lipid                                                                                                | 12/94 | 527/19509  | 0.001   |
|                                    | GO:0030198  | extracellular matrix organization                                                                                         | 9/94  | 197/19509  | 0.0001  |
|                                    | GO:0043062  | extracellular structure organization                                                                                      | 9/94  | 198/19509  | 0.0001  |
|                                    | GO:00339931 | response to lipid                                                                                                         | 23/94 | 1108/19509 | 0.00000 |
| Upregulated genes 24 hrs Post-FUS  | GO:0002253  | activation of immune response                                                                                             | 14/90 | 267/19509  | 0       |
|                                    | GO:0002250  | adaptive immune response                                                                                                  | 12/90 | 280/19509  | 0.00000 |
|                                    | GO:00024601 | adaptive immune response based on somatic recombination of immune receptors built from immunoglobulin superfamily domains | 8/90  | 211/19509  | 0.0001  |
|                                    | GO:0019882  | antigen processing and presentation                                                                                       | 7/90  | 114/19509  | 0.00002 |
|                                    | GO:0019884  | antigen processing and presentation of exogenous antigen                                                                  | 4/90  | 27/19509   | 0.0001  |
|                                    | GO:0002478  | antigen processing and presentation of exogenous peptide antigen                                                          | 4/90  | 22/19509   | 0.0001  |
|                                    | GO:0019886  | antigen processing and presentation of exogenous peptide antigen via MHC class II                                         | 3/90  | 14/19509   | 0.0005  |
|                                    | GO:0048002  | antigen processing and presentation of peptide antigen                                                                    | 6/90  | 69/19509   | 0.00002 |
|                                    | GO:0002495  | antigen processing and presentation of peptide antigen via MHC class II                                                   | 5/90  | 20/19509   | 0.00000 |
|                                    | GO:0002504  | antigen processing and presentation of peptide or polysaccharide antigen via MHC class II                                 | 6/90  | 25/19509   | 0.00000 |
|                                    | GO:0019724  | B cell mediated immunity                                                                                                  | 6/90  | 103/19509  | 0.0001  |
|                                    | GO:0050853  | B cell receptor signaling pathway                                                                                         | 4/90  | 40/19509   | 0.0005  |
|                                    | GO:00017751 | cell activation                                                                                                           | 28/90 | 799/19509  | 0       |

|             |                                                                    |       |            |         |
|-------------|--------------------------------------------------------------------|-------|------------|---------|
| GO:0002263  | cell activation involved in immune response                        | 10/90 | 194/19509  | 0.00000 |
| GO:00603261 | cell chemotaxis                                                    | 11/90 | 216/19509  | 0.00000 |
| GO:00164771 | cell migration                                                     | 18/90 | 1108/19509 | 0.00005 |
| GO:00082831 | cell proliferation                                                 | 26/90 | 1828/19509 | 0.00000 |
| GO:00712161 | cellular response to biotic stimulus                               | 11/90 | 236/19509  | 0.00000 |
| GO:00713962 | cellular response to lipid                                         | 13/90 | 527/19509  | 0.00002 |
| GO:00712221 | cellular response to lipopolysaccharide                            | 9/90  | 206/19509  | 0.00001 |
| GO:00712191 | cellular response to molecule of bacterial origin                  | 9/90  | 216/19509  | 0.00002 |
| GO:00069351 | chemotaxis                                                         | 13/90 | 446/19509  | 0.00000 |
| GO:0006956  | complement activation                                              | 4/90  | 44/19509   | 0.001   |
| GO:00018161 | cytokine production                                                | 13/90 | 557/19509  | 0.00003 |
| GO:00069521 | defense response                                                   | 34/90 | 1191/19509 | 0       |
| GO:0042742  | defense response to bacterium                                      | 7/90  | 221/19509  | 0.001   |
| GO:0098542  | defense response to other organism                                 | 10/90 | 467/19509  | 0.001   |
| GO:00716211 | granulocyte chemotaxis                                             | 7/90  | 87/19509   | 0.00001 |
| GO:00975301 | granulocyte migration                                              | 7/90  | 98/19509   | 0.00001 |
| GO:0034109  | homotypic cell-cell adhesion                                       | 16/90 | 464/19509  | 0.00000 |
| GO:0006959  | humoral immune response                                            | 8/90  | 139/19509  | 0.00001 |
| GO:0002455  | humoral immune response mediated by circulating immunoglobulin     | 4/90  | 40/19509   | 0.0005  |
| GO:00022521 | immune effector process                                            | 21/90 | 624/19509  | 0       |
| GO:00069551 | immune response                                                    | 37/90 | 1030/19509 | 0       |
| GO:0002429  | immune response-activating cell surface receptor signaling pathway | 7/90  | 119/19509  | 0.00003 |
| GO:0002757  | immune response-activating signal transduction                     | 9/90  | 218/19509  | 0.00002 |
| GO:0002768  | immune response-regulating cell surface receptor signaling pathway | 8/90  | 137/19509  | 0.00001 |
| GO:0002764  | immune response-regulating signaling pathway                       | 10/90 | 238/19509  | 0.00001 |
| GO:00023761 | immune system process                                              | 44/90 | 2040/19509 | 0       |
| GO:0016064  | immunoglobulin mediated immune response                            | 6/90  | 101/19509  | 0.0001  |
| GO:00069541 | inflammatory response                                              | 17/90 | 540/19509  | 0.00000 |
| GO:0002437  | inflammatory response to antigenic stimulus                        | 5/90  | 63/19509   | 0.0002  |
| GO:00450871 | innate immune response                                             | 19/90 | 471/19509  | 0       |
| GO:00453211 | leukocyte activation                                               | 24/90 | 678/19509  | 0       |
| GO:0002366  | leukocyte activation involved in immune response                   | 10/90 | 192/19509  | 0.00000 |
| GO:0070486  | leukocyte aggregation                                              | 14/90 | 397/19509  | 0.00000 |
| GO:0007159  | leukocyte cell-cell adhesion                                       | 14/90 | 426/19509  | 0.00000 |
| GO:00305951 | leukocyte chemotaxis                                               | 9/90  | 159/19509  | 0.00000 |
| GO:0043299  | leukocyte degranulation                                            | 5/90  | 64/19509   | 0.0002  |
| GO:0002443  | leukocyte mediated immunity                                        | 11/90 | 280/19509  | 0.00000 |
| GO:00509001 | leukocyte migration                                                | 11/90 | 253/19509  | 0.00000 |
| GO:0070661  | leukocyte proliferation                                            | 13/90 | 266/19509  | 0.00000 |
| GO:0046649  | lymphocyte activation                                              | 18/90 | 564/19509  | 0       |
| GO:0071593  | lymphocyte aggregation                                             | 13/90 | 390/19509  | 0.00000 |
| GO:0046651  | lymphocyte proliferation                                           | 13/90 | 254/19509  | 0.00000 |
| GO:0032943  | mononuclear cell proliferation                                     | 13/90 | 256/19509  | 0.00000 |
| GO:0002275  | myeloid cell activation involved in immune response                | 7/90  | 69/19509   | 0.00000 |
| GO:0002274  | myeloid leukocyte activation                                       | 9/90  | 164/19509  | 0.00000 |
| GO:00024441 | myeloid leukocyte mediated immunity                                | 7/90  | 82/19509   | 0.00000 |
| GO:00975291 | myeloid leukocyte migration                                        | 8/90  | 143/19509  | 0.00001 |
| GO:0050866  | negative regulation of cell activation                             | 8/90  | 158/19509  | 0.00002 |
| GO:0002683  | negative regulation of immune system process                       | 10/90 | 373/19509  | 0.0001  |
| GO:0002695  | negative regulation of leukocyte activation                        | 8/90  | 142/19509  | 0.00001 |
| GO:1903038  | negative regulation of leukocyte cell-cell adhesion                | 5/90  | 96/19509   | 0.001   |
| GO:0051250  | negative regulation of lymphocyte activation                       | 6/90  | 124/19509  | 0.0003  |
| GO:0050868  | negative regulation of T cell activation                           | 5/90  | 91/19509   | 0.001   |
| GO:00305931 | neutrophil chemotaxis                                              | 7/90  | 75/19509   | 0.00000 |
| GO:19902661 | neutrophil migration                                               | 7/90  | 84/19509   | 0.00000 |
| GO:00026751 | positive regulation of acute inflammatory response                 | 4/90  | 30/19509   | 0.0002  |
| GO:0002821  | positive regulation of adaptive immune response                    | 5/90  | 82/19509   | 0.001   |
| GO:00457661 | positive regulation of angiogenesis                                | 6/90  | 124/19509  | 0.0003  |
| GO:00485201 | positive regulation of behavior                                    | 6/90  | 148/19509  | 0.001   |
| GO:0022409  | positive regulation of cell-cell adhesion                          | 8/90  | 186/19509  | 0.00005 |
| GO:0045785  | positive regulation of cell adhesion                               | 10/90 | 334/19509  | 0.0001  |
| GO:00303351 | positive regulation of cell migration                              | 12/90 | 383/19509  | 0.00001 |

|             |                                                                              |       |            |         |
|-------------|------------------------------------------------------------------------------|-------|------------|---------|
| GO:20001471 | positive regulation of cell motility                                         | 12/90 | 394/19509  | 0.00001 |
| GO:00512721 | positive regulation of cellular component movement                           | 12/90 | 403/19509  | 0.00001 |
| GO:00509211 | positive regulation of chemotaxis                                            | 6/90  | 120/19509  | 0.0003  |
| GO:00018191 | positive regulation of cytokine production                                   | 11/90 | 334/19509  | 0.00001 |
| GO:00313491 | positive regulation of defense response                                      | 9/90  | 252/19509  | 0.00005 |
| GO:0034112  | positive regulation of homotypic cell-cell adhesion                          | 7/90  | 151/19509  | 0.0001  |
| GO:0050778  | positive regulation of immune response                                       | 18/90 | 412/19509  | 0       |
| GO:00026841 | positive regulation of immune system process                                 | 23/90 | 690/19509  | 0       |
| GO:00507291 | positive regulation of inflammatory response                                 | 6/90  | 93/19509   | 0.0001  |
| GO:1903039  | positive regulation of leukocyte cell-cell adhesion                          | 7/90  | 152/19509  | 0.0001  |
| GO:00026871 | positive regulation of leukocyte migration                                   | 6/90  | 115/19509  | 0.0002  |
| GO:00400171 | positive regulation of locomotion                                            | 12/90 | 414/19509  | 0.00001 |
| GO:00321031 | positive regulation of response to external stimulus                         | 11/90 | 263/19509  | 0.00000 |
| GO:00485841 | positive regulation of response to stimulus                                  | 28/90 | 1688/19509 | 0.00000 |
| GO:19030361 | positive regulation of response to wounding                                  | 7/90  | 141/19509  | 0.0001  |
| GO:0050870  | positive regulation of T cell activation                                     | 6/90  | 146/19509  | 0.001   |
| GO:0032760  | positive regulation of tumor necrosis factor production                      | 6/90  | 61/19509   | 0.00001 |
| GO:1903557  | positive regulation of tumor necrosis factor superfamily cytokine production | 6/90  | 62/19509   | 0.00001 |
| GO:19040181 | positive regulation of vasculature development                               | 6/90  | 133/19509  | 0.0005  |
| GO:0002673  | regulation of acute inflammatory response                                    | 5/90  | 58/19509   | 0.0001  |
| GO:0002819  | regulation of adaptive immune response                                       | 6/90  | 126/19509  | 0.0004  |
| GO:00457651 | regulation of angiogenesis                                                   | 7/90  | 205/19509  | 0.001   |
| GO:0002577  | regulation of antigen processing and presentation                            | 3/90  | 17/19509   | 0.001   |
| GO:0022407  | regulation of cell-cell adhesion                                             | 11/90 | 333/19509  | 0.00001 |
| GO:0050865  | regulation of cell activation                                                | 13/90 | 430/19509  | 0.00000 |
| GO:0030155  | regulation of cell adhesion                                                  | 13/90 | 581/19509  | 0.00005 |
| GO:00303341 | regulation of cell migration                                                 | 13/90 | 638/19509  | 0.0001  |
| GO:20001451 | regulation of cell motility                                                  | 13/90 | 671/19509  | 0.0002  |
| GO:00421271 | regulation of cell proliferation                                             | 19/90 | 1501/19509 | 0.001   |
| GO:00512701 | regulation of cellular component movement                                    | 13/90 | 749/19509  | 0.001   |
| GO:00018171 | regulation of cytokine production                                            | 13/90 | 502/19509  | 0.00001 |
| GO:00313471 | regulation of defense response                                               | 12/90 | 537/19509  | 0.0001  |
| GO:0034110  | regulation of homotypic cell-cell adhesion                                   | 10/90 | 257/19509  | 0.00001 |
| GO:0002920  | regulation of humoral immune response                                        | 4/90  | 37/19509   | 0.0004  |
| GO:0002697  | regulation of immune effector process                                        | 10/90 | 378/19509  | 0.0002  |
| GO:0050776  | regulation of immune response                                                | 21/90 | 525/19509  | 0       |
| GO:00026821 | regulation of immune system process                                          | 26/90 | 1089/19509 | 0       |
| GO:00507271 | regulation of inflammatory response                                          | 8/90  | 248/19509  | 0.0003  |
| GO:0002694  | regulation of leukocyte activation                                           | 12/90 | 396/19509  | 0.00001 |
| GO:1903037  | regulation of leukocyte cell-cell adhesion                                   | 10/90 | 245/19509  | 0.00001 |
| GO:00026851 | regulation of leukocyte migration                                            | 6/90  | 151/19509  | 0.001   |
| GO:0070663  | regulation of leukocyte proliferation                                        | 10/90 | 197/19509  | 0.00000 |
| GO:00400121 | regulation of locomotion                                                     | 14/90 | 744/19509  | 0.0001  |
| GO:0051249  | regulation of lymphocyte activation                                          | 11/90 | 335/19509  | 0.00001 |
| GO:0050670  | regulation of lymphocyte proliferation                                       | 10/90 | 189/19509  | 0.00000 |
| GO:0032944  | regulation of mononuclear cell proliferation                                 | 10/90 | 191/19509  | 0.00000 |
| GO:0002886  | regulation of myeloid leukocyte mediated immunity                            | 4/90  | 44/19509   | 0.001   |
| GO:00321011 | regulation of response to external stimulus                                  | 15/90 | 790/19509  | 0.0001  |
| GO:1903034  | regulation of response to wounding                                           | 9/90  | 369/19509  | 0.001   |
| GO:0050863  | regulation of T cell activation                                              | 9/90  | 235/19509  | 0.00003 |
| GO:0042129  | regulation of T cell proliferation                                           | 8/90  | 139/19509  | 0.00001 |
| GO:0032680  | regulation of tumor necrosis factor production                               | 7/90  | 107/19509  | 0.00002 |
| GO:1903555  | regulation of tumor necrosis factor superfamily cytokine production          | 7/90  | 109/19509  | 0.00002 |
| GO:19013421 | regulation of vasculature development                                        | 7/90  | 222/19509  | 0.001   |
| GO:00096171 | response to bacterium                                                        | 14/90 | 608/19509  | 0.00002 |
| GO:00096071 | response to biotic stimulus                                                  | 21/90 | 938/19509  | 0.00000 |
| GO:00340971 | response to cytokine                                                         | 14/90 | 644/19509  | 0.00003 |
| GO:00432071 | response to external biotic stimulus                                         | 21/90 | 909/19509  | 0.00000 |
| GO:00343411 | response to interferon-gamma                                                 | 5/90  | 93/19509   | 0.001   |
| GO:00339932 | response to lipid                                                            | 19/90 | 1108/19509 | 0.00001 |
| GO:00324961 | response to lipopolysaccharide                                               | 10/90 | 403/19509  | 0.0002  |
| GO:00022371 | response to molecule of bacterial origin                                     | 11/90 | 418/19509  | 0.0001  |
| GO:00517071 | response to other organism                                                   | 21/90 | 907/19509  | 0.00000 |

|             |                                                       |       |            |         |
|-------------|-------------------------------------------------------|-------|------------|---------|
| GO:00069501 | response to stress                                    | 43/90 | 3260/19509 | 0       |
| GO:00096111 | response to wounding                                  | 16/90 | 728/19509  | 0.00001 |
| GO:0098602  | single organism cell adhesion                         | 20/90 | 708/19509  | 0       |
| GO:0016337  | single organismal cell-cell adhesion                  | 19/90 | 655/19509  | 0       |
| GO:0042110  | T cell activation                                     | 13/90 | 389/19509  | 0.00000 |
| GO:0070489  | T cell aggregation                                    | 13/90 | 389/19509  | 0.00000 |
| GO:0042098  | T cell proliferation                                  | 11/90 | 174/19509  | 0.00000 |
| GO:00423301 | taxis                                                 | 13/90 | 447/19509  | 0.00000 |
| GO:0032640  | tumor necrosis factor production                      | 7/90  | 108/19509  | 0.00002 |
| GO:0071706  | tumor necrosis factor superfamily cytokine production | 7/90  | 111/19509  | 0.00002 |

**Supplementary Table 6: Differential expression of selected genes at 6 and 24 hrs post-FUS as measured by microarray analysis and qRT-PCR**

| Gene Symbol | Log2 Fold Change Compared to Contralateral Hemisphere (adjusted p-value) |                      |                     |                         |
|-------------|--------------------------------------------------------------------------|----------------------|---------------------|-------------------------|
|             | 6 hrs Post-FUS                                                           |                      | 24 hrs Post-FUS     |                         |
|             | Microarray                                                               | qRT-PCR              | Microarray          | qRT-PCR                 |
| Abcb1a      | <b>-1.14 (0.044)</b>                                                     | <b>-3.14 (0.049)</b> | 0.08 (0.928)        | 0.68 (0.394)            |
| Ccl2        | <b>4.73 (&lt;0.001)</b>                                                  | <b>6.16 (0.021)</b>  | 1.70 (0.086)        | 2.79 (0.255)            |
| Cd74        | 0.34 (0.741)                                                             | 0.23 (0.835)         | <b>2.64 (0.010)</b> | <b>3.99 (0.001)</b>     |
| Gfap        | 0.29 (0.479)                                                             | -0.17 (0.762)        | <b>1.54 (0.003)</b> | <b>2.05 (&lt;0.001)</b> |
| Itgb2       | 0.47 (0.479)                                                             | 0.36 (0.613)         | <b>1.38 (0.035)</b> | <b>1.77 (0.011)</b>     |
| Lcn2        | <b>2.02 (0.008)</b>                                                      | <b>2.16 (0.036)</b>  | <b>2.91 (0.003)</b> | <b>4.41 (&lt;0.001)</b> |
| Serpine1    | <b>2.37 (0.037)</b>                                                      | <b>3.42 (0.013)</b>  | 1.97 (0.092)        | <b>3.07 (0.043)</b>     |
| Slc22a6     | <b>-1.83 (0.003)</b>                                                     | <b>-2.98 (0.001)</b> | 0.18 (0.801)        | 0.51 (0.386)            |
